# Supplementary material for: Highly efficient and eco-friendly protocol to functionalized imidazoles via ring-opening of α-nitro epoxides
Source: Royal Society of Chemistry journal article supplement (doi:10.1039/c5ra07770b), 2015-01-01
Supplement: c5ra07770b1.pdf [file c5ra07770b1.pdf]

## Supporting Information

### Highly efficient and eco-friendly protocol to functionalized imidazoles via Ring-Opening of $\alpha$ -Nitro Epoxides

Xiao Guo, Jiaan Shao, Huan Liu, Binhui Chen, Wenteng Chen, Yongping Yu\*

*Zhejiang Province Key Laboratory of Anti-Cancer Drug Research, College of Pharmaceutical Science, Zhejiang University, 866 Yuhangtang Road, Zijing Campus, Hangzhou 310058, China*

\*Corresponding authors: E-mail: [yyu@zju.edu.cn](mailto:yyu@zju.edu.cn)

#### List of contents

|                                                               |         |
|---------------------------------------------------------------|---------|
| 1. General Information.....                                   | S2      |
| 2. General Procedure for the Synthesis of 3a-3u.....          | S2      |
| 3. Characterization Data of 3a-3u.....                        | S2-S9   |
| 4. $^1\text{H}$ and $^{13}\text{C}$ NMR Spectra of 3a-3u..... | S10-S30 |

### General Information:

All solvents were purified according to standard methods prior to use. Melting points were recorded on a BÜCHI B-540 melting point apparatus. NMR spectra were recorded for  $^1\text{H}$  NMR at 500 MHz and  $^{13}\text{C}$  NMR at 125 MHz. For  $^1\text{H}$  NMR, tetramethylsilane (TMS) served as internal standard ( $\delta=0$ ) and data are reported as follows: chemical shift, integration, multiplicity (s=singlet, d=doublet, t=triplet, q=quartet, m=multiplet), and coupling constant(s) in Hertz. For  $^{13}\text{C}$  NMR, TMS ( $\delta=0$ ) or DMSO ( $\delta=40.45$ ) was used as internal standard and spectra were obtained with complete proton decoupling. IR spectra were recorded with a BRUKER VEC TOR 22 FT-IR spectrometer. LC-MS and HRMS data was obtained using Agilent Technologies 6224 TOF LC/MS. The starting material  $\alpha$ -nitro epoxides were prepared according to literature methods. [1, 2] The starting material amines and amidine were commercially available.

### General Procedure for the Synthesis of 3a-3u:

A mixture of amidines (0.15 mmol, 1.5 equiv), base (0.2 mmol, 2.0 equiv) and 3 mL of solvent was stirred at 25 °C for 0.5h, nitroepoxide 1 (0.1 mmol, 1.0 equiv) was added, then the mixture was stirred at 25 °C for 8h. After the completeness of the reaction, the mixture was diluted with water and extracted three times with  $\text{CHCl}_3$  ( $3 \times 10$  mL). The combined organic extracts were washed with brine, dried over  $\text{Na}_2\text{SO}_4$ , concentrated and purified by flash chromatography (DCM/MeOH) on silica gel to afford 3a-3u.

### Characterization Data of 3a-3u:

5-methyl-4-phenyl-1H-imidazole (3a)

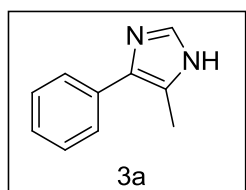

Yellow solid; m.p. 186.6-188.5 °C;  $^1\text{H}$  NMR (500 MHz, DMSO)  $\delta$  12.08 (s, 1H), 7.61 (dd,  $J = 8.1, 0.9$  Hz, 2H), 7.59 (s, 1H), 7.39 (dd,  $J = 10.7, 4.8$  Hz, 2H), 7.23-7.19 (m, 1H), 2.37 (s, 3H).  $^{13}\text{C}$  NMR (125 MHz, DMSO)  $\delta$  134.2, 128.9, 126.3, 126.0, 12.5; IR (KBr)  $\nu$ : 3438, 3274, 3127, 3074, 3006, 2918, 2850, 2805, 2746, 2691, 2637, 2368, 1956, 1742, 1663, 1599, 1518, 1479, 1438, 1304, 1130, 1071, 951, 810, 767, 699  $\text{cm}^{-1}$ ; HRMS (ESI):  $m/z$  calcd. for  $\text{C}_{10}\text{H}_{11}\text{N}_2$   $[\text{M}+\text{H}]^+$ : 159.0917, found: 159.0915.

4-(4-fluorophenyl)-5-methyl-1*H*-imidazole (3b)

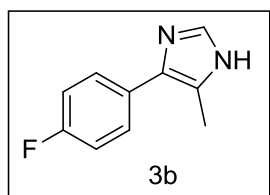

Yellow solid; m.p.156.8-158.6 °C; <sup>1</sup>H NMR (500 MHz, DMSO) δ 12.11 (s, 1H), 7.65-7.62 (m, 2H), 7.59 (s, 1H), 7.24-7.19 (m, 2H), 2.36 (s, 3H). <sup>13</sup>C NMR (125 MHz, DMSO) δ 161.9, 160.0, 134.2, 128.1, 115.7, 12.1; .HRMS (ESI): m/z calcd.for C<sub>10</sub>H<sub>10</sub>FN<sub>2</sub> [M+H]<sup>+</sup>: 177.0828, found: 177.0827.

4-(4-chlorophenyl)-5-methyl-1*H*-imidazole (3c)

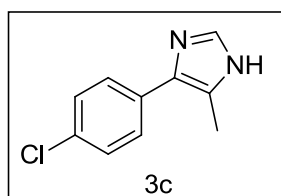

Yellow solid; m.p. 202.5-204.6 °C; <sup>1</sup>H NMR (500 MHz, DMSO) δ 12.11 (s, 1H), 7.64 (d, *J* = 8.4 Hz, 2H), 7.60 (s, 1H), 7.43 (d, *J* = 8.4 Hz, 2H), 2.38 (s, 3H). <sup>13</sup>C NMR (125 MHz, DMSO) δ 134.4, 130.4, 128.8, 127.8, 12.2; HRMS (ESI): m/z calcd.for C<sub>10</sub>H<sub>10</sub>ClN<sub>2</sub> [M+H]<sup>+</sup>:193.0527, found: 193.0537.

4-(4-bromophenyl)-5-methyl-1*H*-imidazole (3d)

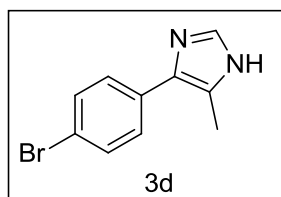

White solid; m.p. 215.1-216.2 °C; <sup>1</sup>H NMR (500 MHz, MeOD) δ 7.63 (s, 1H), 7.57-7.56 (m, 2H), 7.51-7.49 (m, 2H), 2.41 (s, 3H). <sup>13</sup>C NMR (125 MHz, MeOD) δ 133.8, 132.9, 131.2, 128.1, 119.7, 10.3; HRMS (ESI): m/z calcd. for C<sub>10</sub>H<sub>10</sub>BrN<sub>2</sub> [M+H]<sup>+</sup>:237.0022 found: 237.0018.

4-(2-bromophenyl)-5-methyl-1*H*-imidazole (3e)

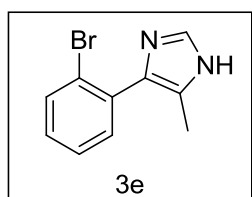

Yellow viscous oil;  $^1\text{H}$  NMR (500 MHz,  $\text{CDCl}_3$ )  $\delta$  9.43 (s, 1H), 7.64-7.62 (m, 1H), 7.52 (s, 1H), 7.34 -7.30 (m, 2H), 7.19 (ddd,  $J = 8.0, 6.6, 2.6$  Hz, 1H), 2.18 (s, 3H).  $^{13}\text{C}$  NMR (125 MHz,  $\text{CDCl}_3$ )  $\delta$  134.0, 133.3, 133.1, 132.3, 131.7, 129.3, 127.9, 127.2, 124.0, 11.4; HRMS (ESI):  $m/z$  calcd. for  $\text{C}_{10}\text{H}_{10}\text{BrN}_2$   $[\text{M}+\text{H}]^+$ : 237.0022 found: 237.0020.

4-(3-bromophenyl)-5-methyl-1H-imidazole (3f)

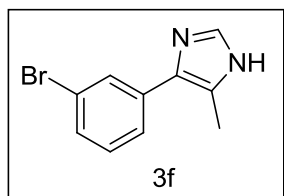

White solid; m.p. 189.2-191.5  $^\circ\text{C}$ ;  $^1\text{H}$  NMR (500 MHz, DMSO)  $\delta$  12.10 (s, 1H), 7.81 (s, 1H), 7.60 (s, 2H), 7.36 (dt,  $J = 15.5, 7.8$  Hz, 2H), 2.39 (s, 3H).  $^{13}\text{C}$  NMR (125 MHz, DMSO)  $\delta$  134.5, 131.0, 128.5, 124.9, 122.4, 11.3; HRMS (ESI):  $m/z$  calcd. for  $\text{C}_{10}\text{H}_{10}\text{BrN}_2$   $[\text{M}+\text{H}]^+$ : 237.0022 found: 237.0022.

5-ethyl-4-phenyl-1H-imidazole (3g)

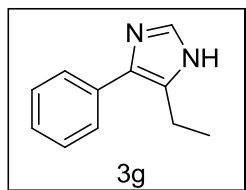

White solid; m.p. 172.3-173.1  $^\circ\text{C}$ ;  $^1\text{H}$  NMR (500 MHz, DMSO)  $\delta$  12.10 (s, 1H), 7.61 (s, 1H), 7.58 (dd,  $J = 8.1, 1.0$  Hz, 2H), 7.39 (dd,  $J = 10.7, 4.9$  Hz, 2H), 7.25-7.19 (m, 1H), 2.76 (q,  $J = 7.5$  Hz, 2H), 1.22 (t,  $J = 7.5$  Hz, 3H).  $^{13}\text{C}$  NMR (125 MHz, DMSO)  $\delta$  135.1, 134.5, 128.9, 126.6, 126.2, 19.5, 14.6; IR (KBr)  $\nu$ : 3440, 3071, 3005, 2964, 2861, 2807, 2759, 2686, 2637, 1825, 1638, 1600, 1518, 1478, 1320, 1262, 1131, 1068, 957, 912, 819, 770, 700  $\text{cm}^{-1}$ ; HRMS (ESI):  $m/z$  calcd. for  $\text{C}_{11}\text{H}_{13}\text{N}_2$   $[\text{M}+\text{H}]^+$ : 173.1073, found: 173.1071.

4-(4-chlorophenyl)-5-ethyl-1H-imidazole (3h)

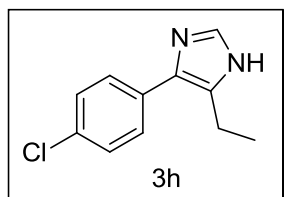

Yellow solid; m.p. 178.2-179.6  $^\circ\text{C}$ ;  $^1\text{H}$  NMR (500 MHz, DMSO)  $\delta$  7.64 (s, 1H), 7.60 (d,  $J = 8.5$  Hz, 2H), 7.45-7.43 (m, 2H), 2.76 (q,  $J = 7.5$  Hz, 2H), 1.21 (t,  $J = 7.5$  Hz, 3H).  $^{13}\text{C}$  NMR (125 MHz,

DMSO)  $\delta$  160.9, 134.7, 130.6, 128.9, 128.8, 128.6, 128.1, 19.3, 14.4; HRMS (ESI):  $m/z$  calcd. for  $C_{11}H_{12}ClN_2$   $[M+H]^+$ :207.0684, found: 207.0692.

2,5-dimethyl-4-phenyl-1H-imidazole (3i)

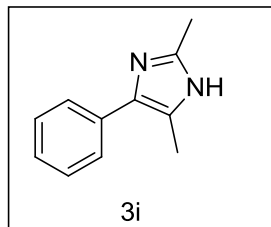

Yellow viscous oil;  $^1H$  NMR (500 MHz,  $CDCl_3$ )  $\delta$  11.45 (s, 1H), 7.49 (d,  $J = 7.6$  Hz, 2H), 7.34 (t,  $J = 7.6$  Hz, 2H), 7.25 (t,  $J = 7.4$  Hz, 1H), 2.35 (s, 3H), 2.34 (s, 3H).  $^{13}C$  NMR (125 MHz,  $CDCl_3$ )  $\delta$  142.9, 130.9, 130.1, 128.7, 127.3, 126.8, 125.2, 12.2, 11.1; IR (KBr)  $\nu$ : 3441, 3144, 2926, 2855, 1967, 1810, 1638, 1600, 1559, 1443, 1402, 1384, 1261, 1122, 1070, 955, 776, 765, 702  $cm^{-1}$ ; HRMS (ESI):  $m/z$  calcd. for  $C_{11}H_{13}N_2$   $[M+H]^+$ :173.1073, found: 173.1073.

4-(4-chlorophenyl)-2,5-dimethyl-1H-imidazole (3j)

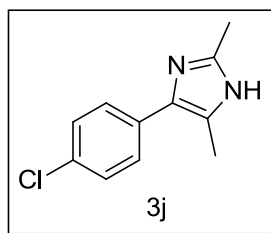

Yellow solid; m.p. 203.5-204.6  $^{\circ}C$ ;  $^1H$  NMR (500 MHz, DMSO)  $\delta$  11.74 (s, 1H), 7.59 (d,  $J = 8.4$  Hz, 2H), 7.40 (d,  $J = 8.5$  Hz, 2H), 2.32 (s, 3H), 2.25 (s, 3H).  $^{13}C$  NMR (125 MHz, DMSO)  $\delta$  142.9, 131.7, 130.0, 128.7, 127.5, 14.2, 11.8; HRMS (ESI):  $m/z$  calcd. for  $C_{11}H_{12}ClN_2$   $[M+H]^+$ :207.0684, found: 207.0682.

4-(4-bromophenyl)-2,5-dimethyl-1H-imidazole (3k)

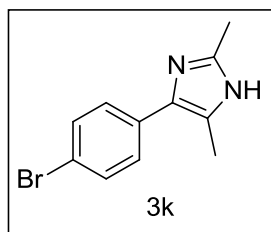

Yellow solid; m.p.202.2-203.8 $^{\circ}C$ ;  $^1H$  NMR (500 MHz, DMSO)  $\delta$  7.53 (s, 4H), 2.32 (s, 3H), 2.26 (s, 3H).  $^{13}C$  NMR (125 MHz, DMSO)  $\delta$  142.8, 131.7, 127.9, 118.5, 14.1, 12.3; HRMS (ESI):  $m/z$  calcd. for  $C_{11}H_{12}BrN_2$   $[M+H]^+$ :251.0178, found: 251.0180.

2,5-dimethyl-4-(naphthalen-2-yl)-1*H*-imidazole (3l)

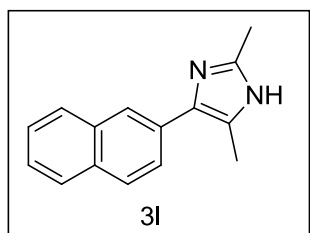

Yellow solid; m.p.236.3-238.6 °C; <sup>1</sup>H NMR (500 MHz, MeOD) δ 7.91 (ddd, *J* = 21.6, 10.5, 6.8 Hz, 3H), 7.55-7.45 (m, 4H), 2.45 (s, 3H), 2.12 (s, 3H). <sup>13</sup>C NMR (125 MHz, MeOD) δ 143.2, 134.0, 132.2, 130.0, 129.5, 127.9, 127.8, 127.7, 127.4, 125.8, 125.6, 125.5, 124.9, 11.8, 9.74; HRMS (ESI): *m/z* calcd. for C<sub>15</sub>H<sub>15</sub>N<sub>2</sub> [M+H]<sup>+</sup>:223.1230, found: 223.1225.

5-ethyl-2-methyl-4-phenyl-1*H*-imidazole (3m)

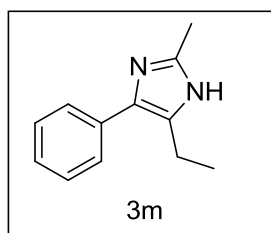

Yellow viscous oil; <sup>1</sup>H NMR (500 MHz, CDCl<sub>3</sub>) δ 10.28 (s, 1H), 7.48 (d, *J* = 7.4 Hz, 2H), 7.35 (t, *J* = 7.6 Hz, 2H), 7.27 (t, *J* = 7.4 Hz, 1H), 2.75 (q, *J* = 7.6 Hz, 2H), 2.36 (s, 3H), 1.26 (t, *J* = 7.6 Hz, 3H). <sup>13</sup>C NMR (125 MHz, CDCl<sub>3</sub>) δ 143.2, 131.4, 131.3, 129.9, 128.7, 127.3, 127.1, 18.7, 14.1, 12.5; HRMS (ESI): *m/z* calcd. for C<sub>12</sub>H<sub>15</sub>N<sub>2</sub> [M+H]<sup>+</sup>: 187.1230, found: 187.1236.

5-ethyl-2-(4-methoxybenzyl)-4-(naphthalen-2-yl)-1*H*-imidazole (3n)

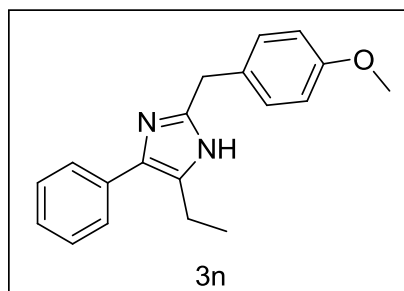

Yellow viscous oil; <sup>1</sup>H NMR (500 MHz, CDCl<sub>3</sub>) δ 9.78 (s, 1H), 7.47-7.45 (m, 2H), 7.33 (t, *J* = 7.6 Hz, 2H), 7.24 (dd, *J* = 12.8, 5.5 Hz, 1H), 7.15 (d, *J* = 8.5 Hz, 2H), 6.71 (d, *J* = 8.4 Hz, 2H), 4.01 (s, 2H), 3.69 (s, 3H), 2.70 (q, *J* = 7.5 Hz, 2H), 1.22 (t, *J* = 7.5 Hz, 3H). <sup>13</sup>C NMR (125 MHz, CDCl<sub>3</sub>) δ 158.6, 146.1, 130.0, 129.9, 129.5, 128.6, 128.4, 127.9, 127.1, 127.0, 114.1, 55.2, 32.6, 18.9, 14.1; IR

(KBr)  $\nu$ : 3436, 3144, 2963, 2928, 2363, 1953, 1602, 1558, 1512, 1453, 1381, 1248, 1125, 1072, 1033, 823, 761, 699  $\text{cm}^{-1}$ ; HRMS (ESI):  $m/z$  calcd. for  $\text{C}_{19}\text{H}_{21}\text{N}_2\text{O}$   $[\text{M}+\text{H}]^+$ : 293.1648, found: 293.1646.

5-methyl-2,4-diphenyl-1*H*-imidazole (3o)

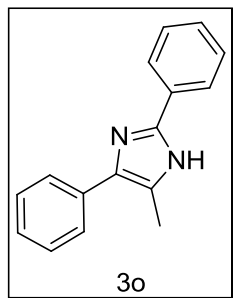

White solid; m.p. 180.2-182.5  $^{\circ}\text{C}$  (Lit.<sup>[3]</sup> 180-184  $^{\circ}\text{C}$ );  $^1\text{H}$  NMR (500 MHz, DMSO)  $\delta$  12.42 (s, 1H), 8.00 (d,  $J = 7.5$  Hz, 2H), 7.71 (d,  $J = 7.1$  Hz, 2H), 7.51-7.39 (m, 4H), 7.38-7.30 (m, 1H), 7.25 (t,  $J = 7.3$  Hz, 1H), 2.46 (s, 3H).  $^{13}\text{C}$  NMR (125 MHz, DMSO)  $\delta$  144.2, 131.1, 129.2, 128.9, 128.3, 126.6, 126.3, 125.1, 12.1; IR (KBr)  $\nu$ : 3441, 3075, 3030, 2960, 2772, 2691, 2634, 2588, 1934, 1880, 1643, 1496, 1460, 1408, 1326, 1280, 1159, 1128, 975, 917, 768, 695  $\text{cm}^{-1}$ ; HRMS (ESI):  $m/z$  calcd. for  $\text{C}_{16}\text{H}_{15}\text{N}_2$   $[\text{M}+\text{H}]^+$ : 235.1230, found: 235.1235.

2-(4-fluorophenyl)-5-methyl-4-phenyl-1*H*-imidazole (4p)

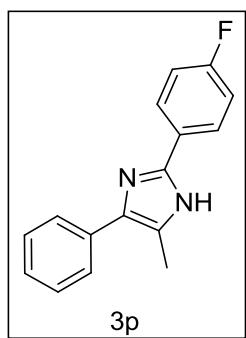

Yellow solid; m.p. 78.6-81.2  $^{\circ}\text{C}$ ;  $^1\text{H}$  NMR (500 MHz,  $\text{CDCl}_3$ )  $\delta$  7.77 (dd,  $J = 8.6, 5.3$  Hz, 2H), 7.56 (d,  $J = 7.8$  Hz, 2H), 7.38 (t,  $J = 7.6$  Hz, 2H), 7.28 (d,  $J = 8.2$  Hz, 1H), 6.98 (t,  $J = 8.4$  Hz, 2H), 2.38 (s, 3H).  $^{13}\text{C}$  NMR (125 MHz,  $\text{CDCl}_3$ )  $\delta$  163.8, 161.8, 144.5, 132.9, 128.6, 127.2, 126.9, 126.7, 126.4, 115.8, 115.7, 12.2; HRMS (ESI):  $m/z$  calcd. for  $\text{C}_{16}\text{H}_{14}\text{FN}_2$   $[\text{M}+\text{H}]^+$ : 253.1136, found: 253.1146.

2-(4-methoxyphenyl)-5-methyl-4-phenyl-1*H*-imidazole (3q)

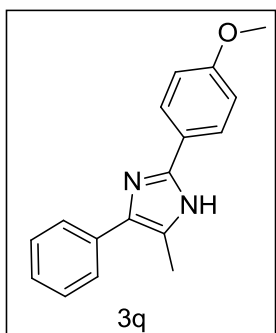

Yellow solid; m.p. 72.1-73.6 °C;  $^1\text{H}$  NMR (500 MHz,  $\text{CDCl}_3$ )  $\delta$  10.39 (s, 1H), 7.83 (d,  $J = 8.6$  Hz, 2H), 7.56 (d,  $J = 7.5$  Hz, 2H), 7.34 (t,  $J = 7.6$  Hz, 2H), 7.23 (t,  $J = 7.3$  Hz, 1H), 6.82 (d,  $J = 8.6$  Hz, 2H), 3.77 (s, 3H), 2.34 (s, 3H).  $^{13}\text{C}$  NMR (125 MHz,  $\text{CDCl}_3$ )  $\delta$  159.7, 145.6, 133.3, 133.0, 128.5, 127.0, 126.9, 126.4, 123.2, 114.1, 55.3, 12.1; HRMS (ESI):  $m/z$  calcd. for  $\text{C}_{17}\text{H}_{17}\text{N}_2\text{O}$   $[\text{M}+\text{H}]^+$ : 265.1335, found: 265.1335

5-ethyl-2,4-diphenyl-1H-imidazole (3r)

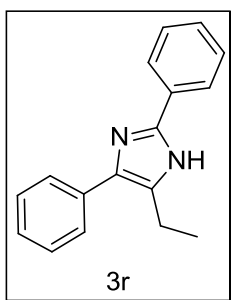

Light yellow solid; m.p. 188.1-189.2 °C;  $^1\text{H}$  NMR (500 MHz, DMSO)  $\delta$  12.34 (s, 1H), 7.99 (d,  $J = 5.4$  Hz, 2H), 7.67 (s, 2H), 7.45 (dd,  $J = 16.7, 8.9$  Hz, 4H), 7.33 (ddd,  $J = 44.7, 19.7, 18.6$  Hz, 2H), 2.84-2.64 (m, 2H), 1.28 (t,  $J = 6.6$  Hz, 3H).  $^{13}\text{C}$  NMR (125 MHz, DMSO)  $\delta$  144.2, 136.3, 136.0, 131.1, 130.8, 129.1, 128.9, 128.3, 126.7, 126.3, 125.2, 18.9, 14.9; HRMS (ESI):  $m/z$  calcd. for  $\text{C}_{10}\text{H}_{17}\text{N}_2$   $[\text{M}+\text{H}]^+$ : 249.1386, found: 249.1380.

5-methyl-4-phenyl-2-(thiophen-2-yl)-1H-imidazole (3s)

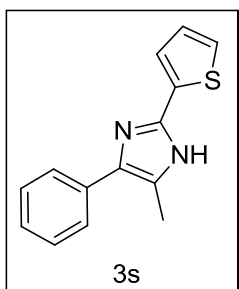



Light yellow solid; m.p. 211.6-213.7 °C; <sup>1</sup>H NMR (500 MHz, CDCl<sub>3</sub>) δ 7.56 (d, *J* = 7.4 Hz, 2H), 7.44 (d, *J* = 3.1 Hz, 1H), 7.37 (t, *J* = 7.7 Hz, 2H), 7.27-7.22 (m, 2H), 6.99 (dd, *J* = 4.7, 3.9 Hz, 1H), 2.41 (s, 3H). <sup>13</sup>C NMR (125 MHz, CDCl<sub>3</sub>) δ 140.9, 133.5, 132.7, 128.6, 127.7, 126.9, 126.6, 125.5, 124.0, 12.4; HRMS (ESI): *m/z* calcd. for C<sub>14</sub>H<sub>13</sub>N<sub>2</sub>S [M+H]<sup>+</sup>: 241.0794, found: 241.0795.

3-methyl-2-phenylimidazo[1,2-a]pyridine (3t)

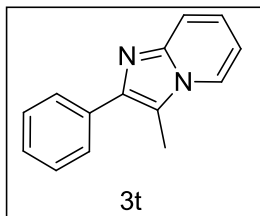

Yellow solid; m.p. 157.2-158.3 °C; <sup>1</sup>H NMR (500 MHz, DMSO) δ 8.26 (dt, *J* = 6.9, 1.1 Hz, 1H), 7.61-7.50 (m, 5H), 7.49-7.42 (m, 1H), 7.24 (ddd, *J* = 9.0, 6.7, 1.2 Hz, 1H), 6.86 (td, *J* = 6.8, 1.2 Hz, 1H), 2.37 (s, 3H). <sup>13</sup>C NMR (125 MHz, DMSO) δ 144.1, 140.8, 129.7, 129.5, 129.4, 128.4, 124.8, 123.9, 121.2, 116.9, 112.6, 14.4; HRMS (ESI): *m/z* calcd. for C<sub>14</sub>H<sub>13</sub>N<sub>2</sub> [M+H]<sup>+</sup>: 209.1073, found: 209.1079.

3-ethyl-2-phenylimidazo[1,2-a]pyridine (3u)

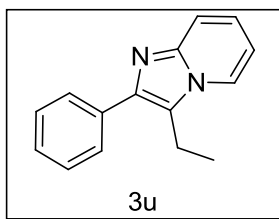

Yellow viscous oil; <sup>1</sup>H NMR (500 MHz, CDCl<sub>3</sub>) δ 8.04 (d, *J* = 6.9 Hz, 1H), 7.59 (d, *J* = 9.0 Hz, 1H), 7.51 (dd, *J* = 10.5, 4.7 Hz, 2H), 7.42 (ddd, *J* = 9.0, 5.3, 1.2 Hz, 3H), 7.12 (ddd, *J* = 8.9, 6.7, 1.1 Hz, 1H), 6.68 (td, *J* = 6.8, 0.9 Hz, 1H), 2.81 (q, *J* = 7.6 Hz, 2H), 1.34 (t, *J* = 7.6 Hz, 3H). <sup>13</sup>C NMR (125 MHz, CDCl<sub>3</sub>) δ 146.5, 144.6, 129.7, 129.5, 129.2, 128.2, 126.2, 124.0, 123.1, 117.1, 111.9, 21.1, 14.5; HRMS (ESI): *m/z* calcd. for C<sub>15</sub>H<sub>15</sub>N<sub>2</sub> [M+H]<sup>+</sup>: 223.1230, found: 223.1236.

# <sup>1</sup>H NMR (500 MHz) and <sup>13</sup>C NMR (125 MHz) Spectra of 3a-3u:

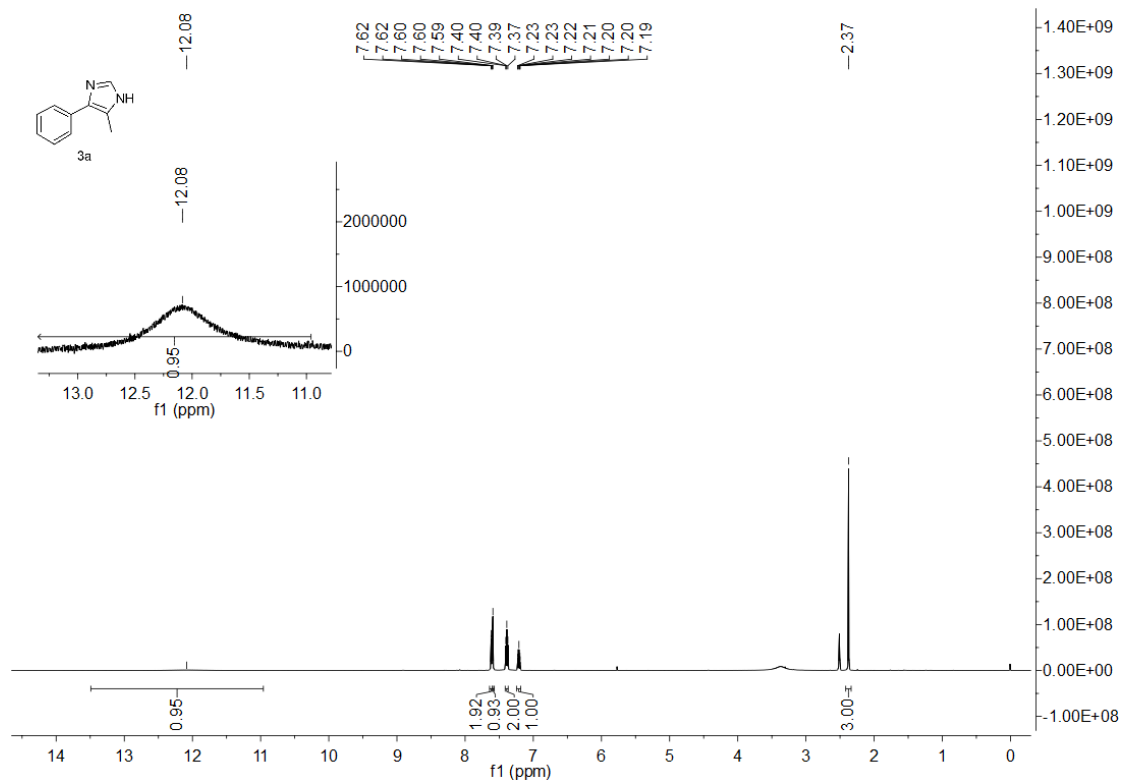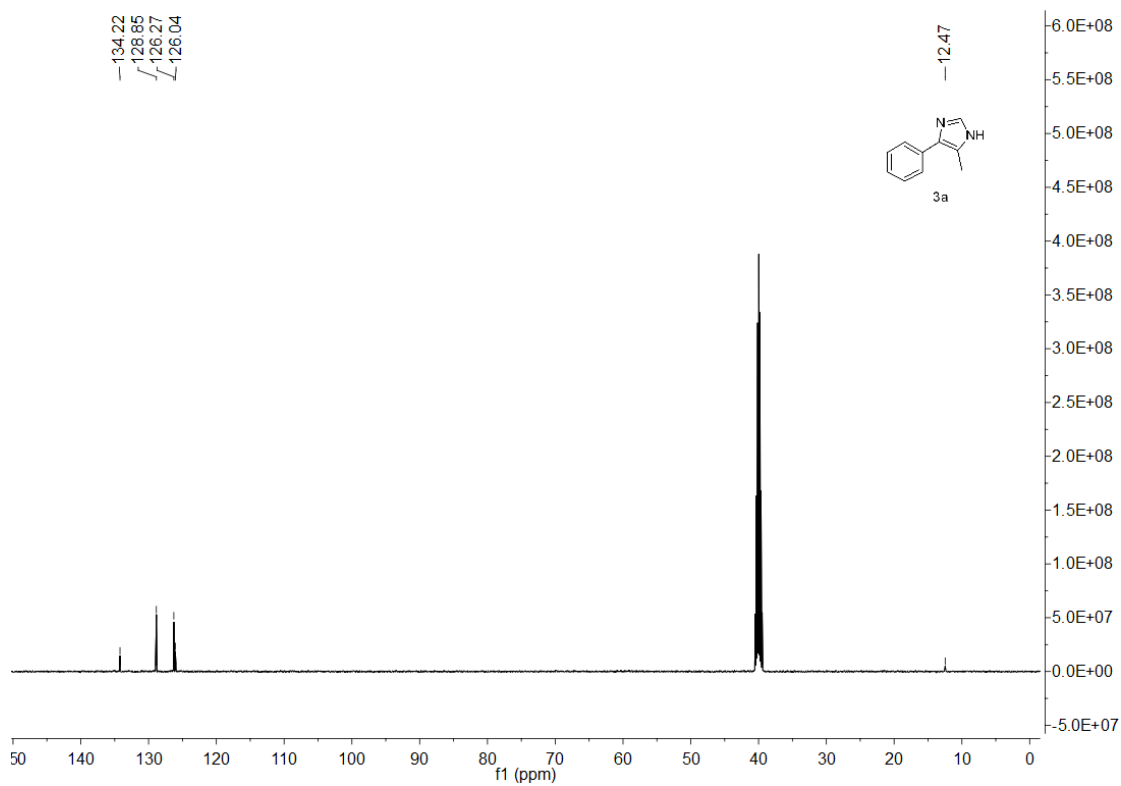

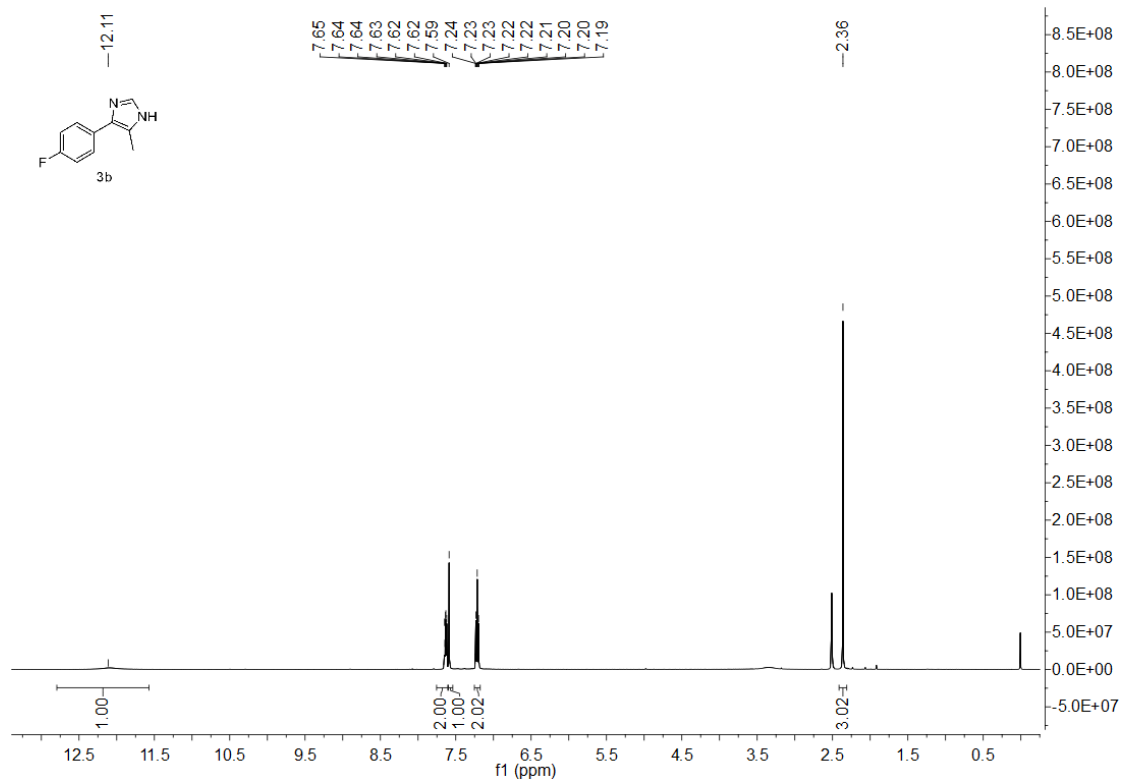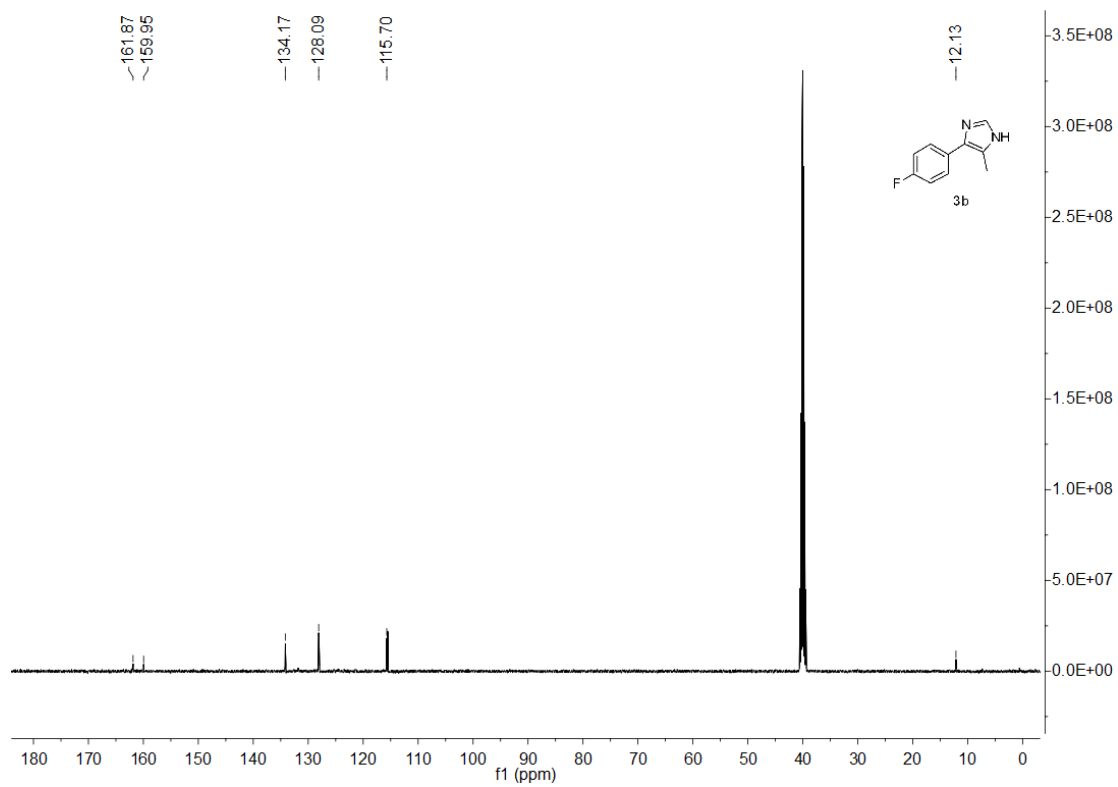

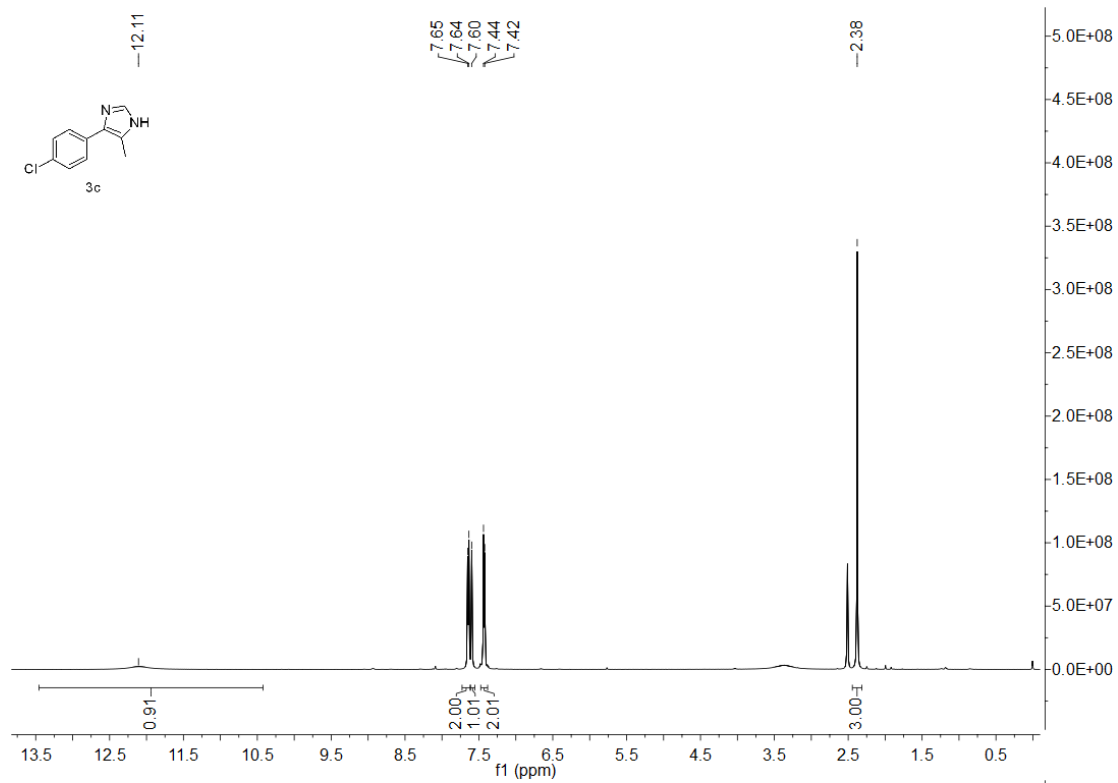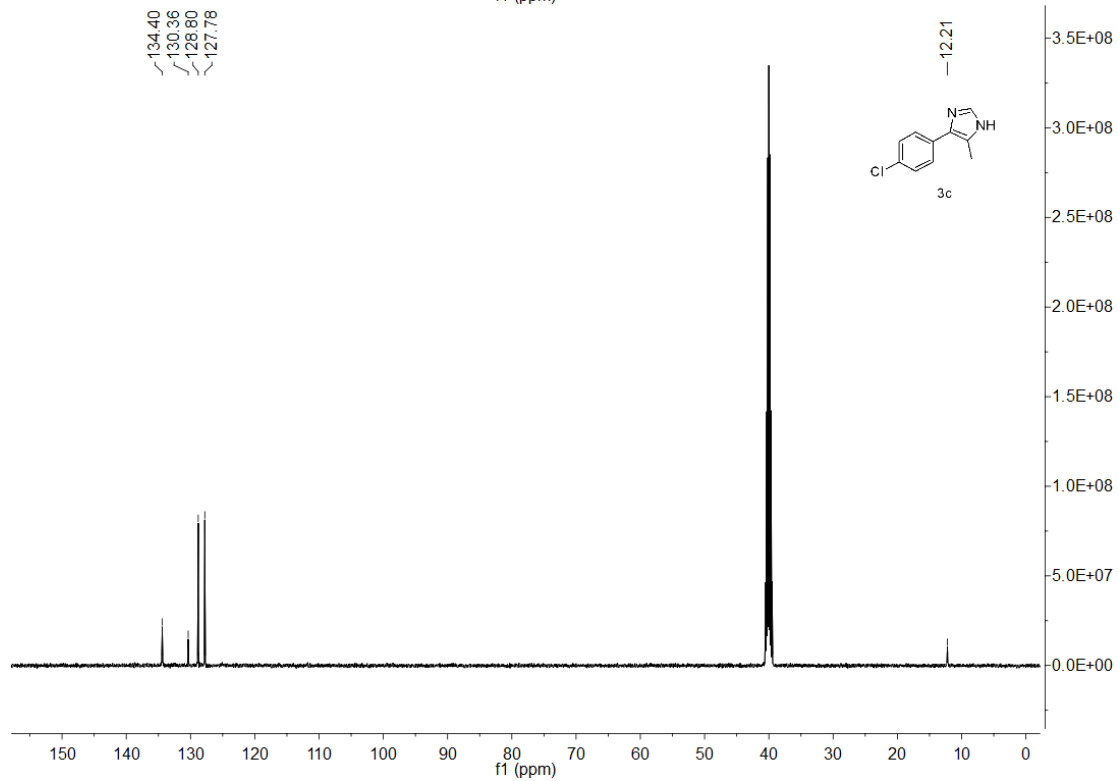

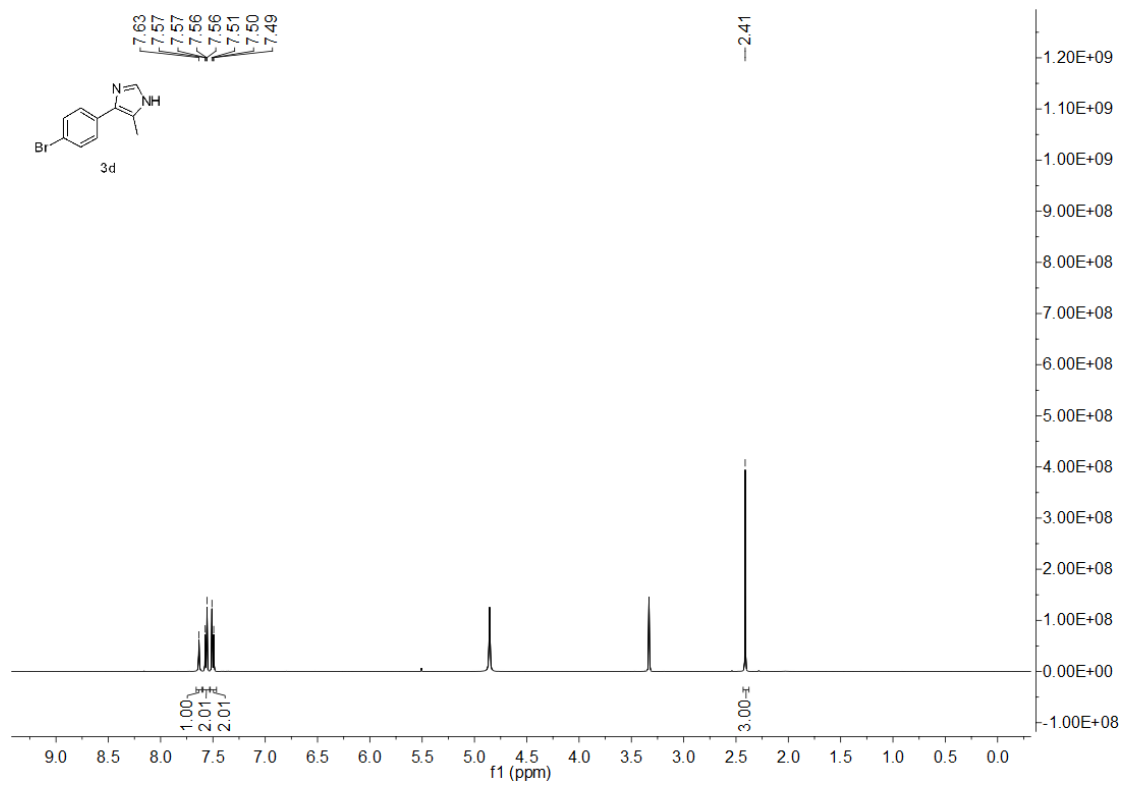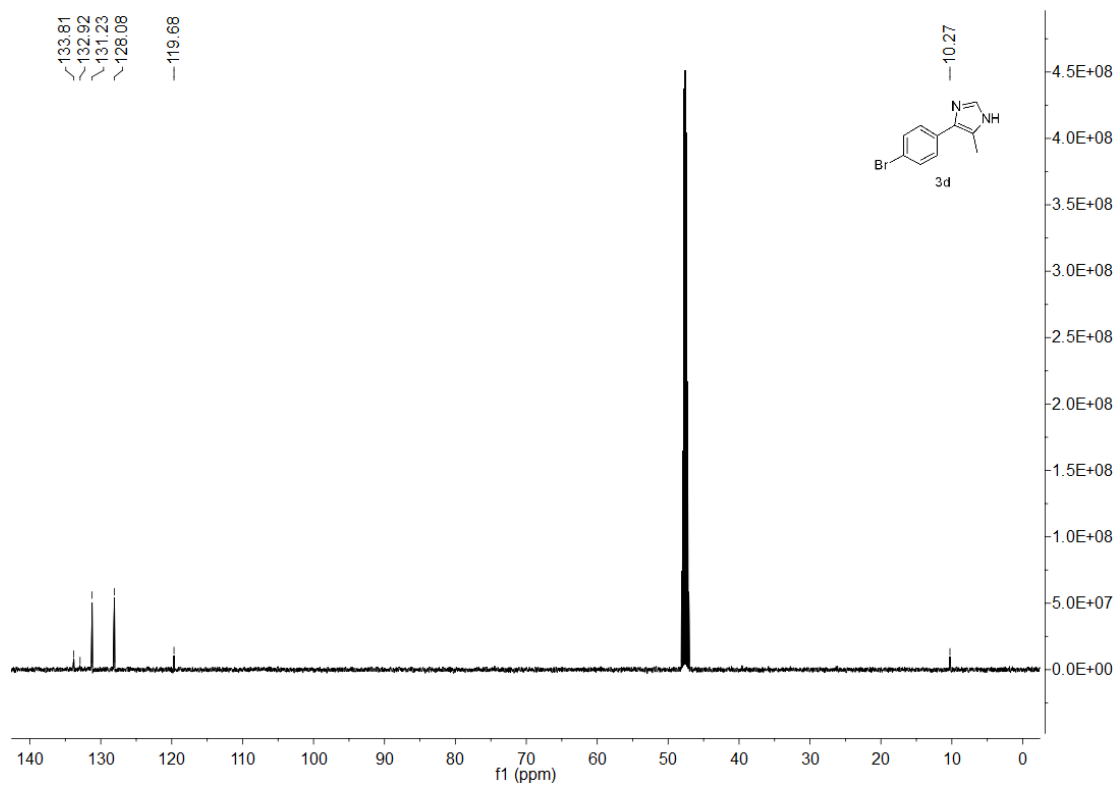

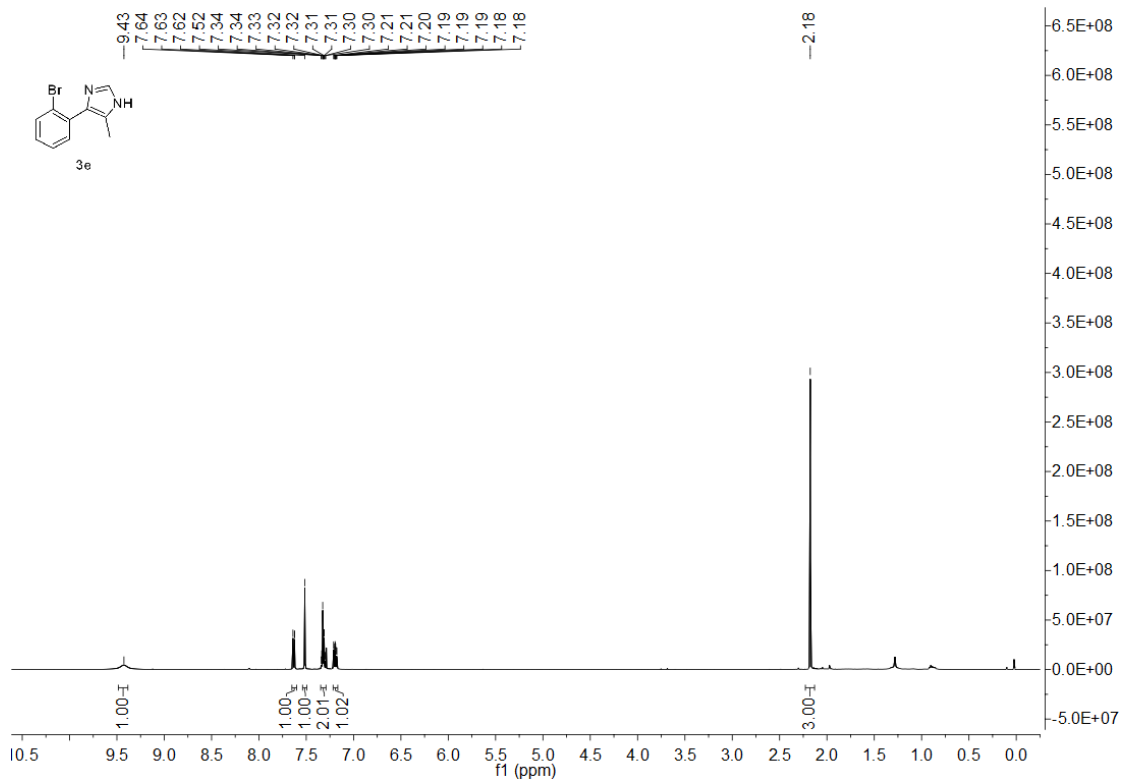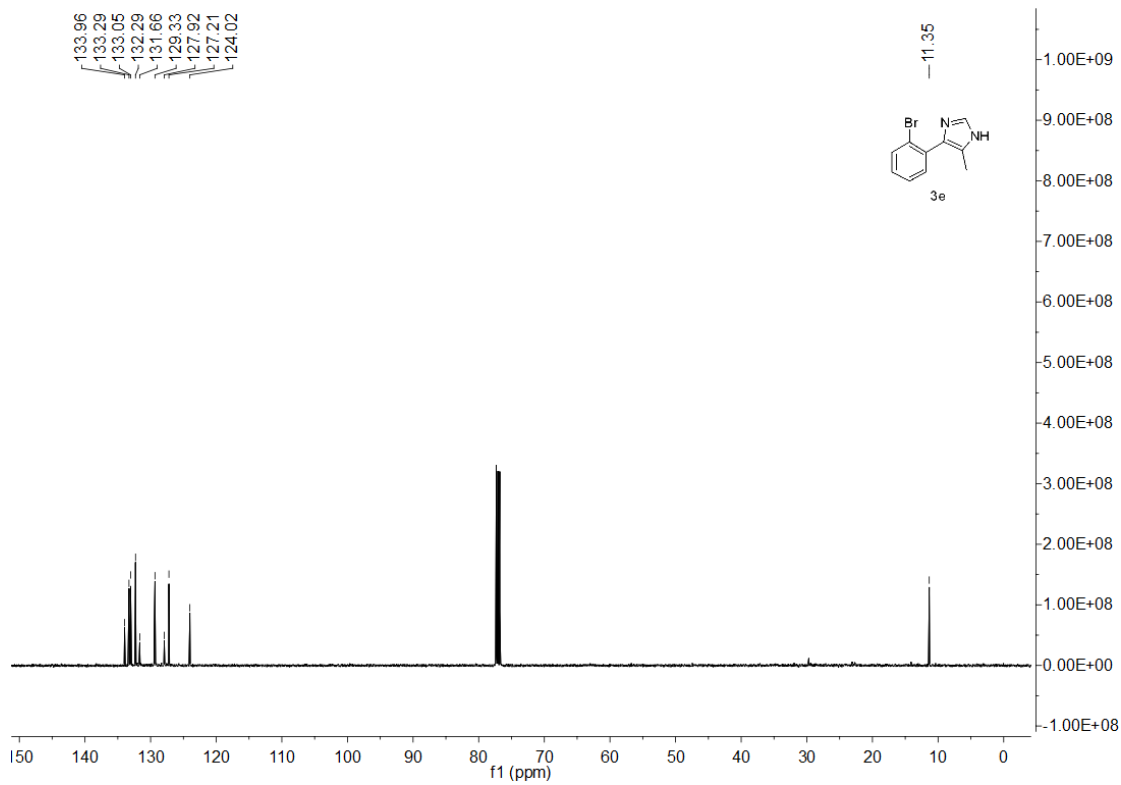

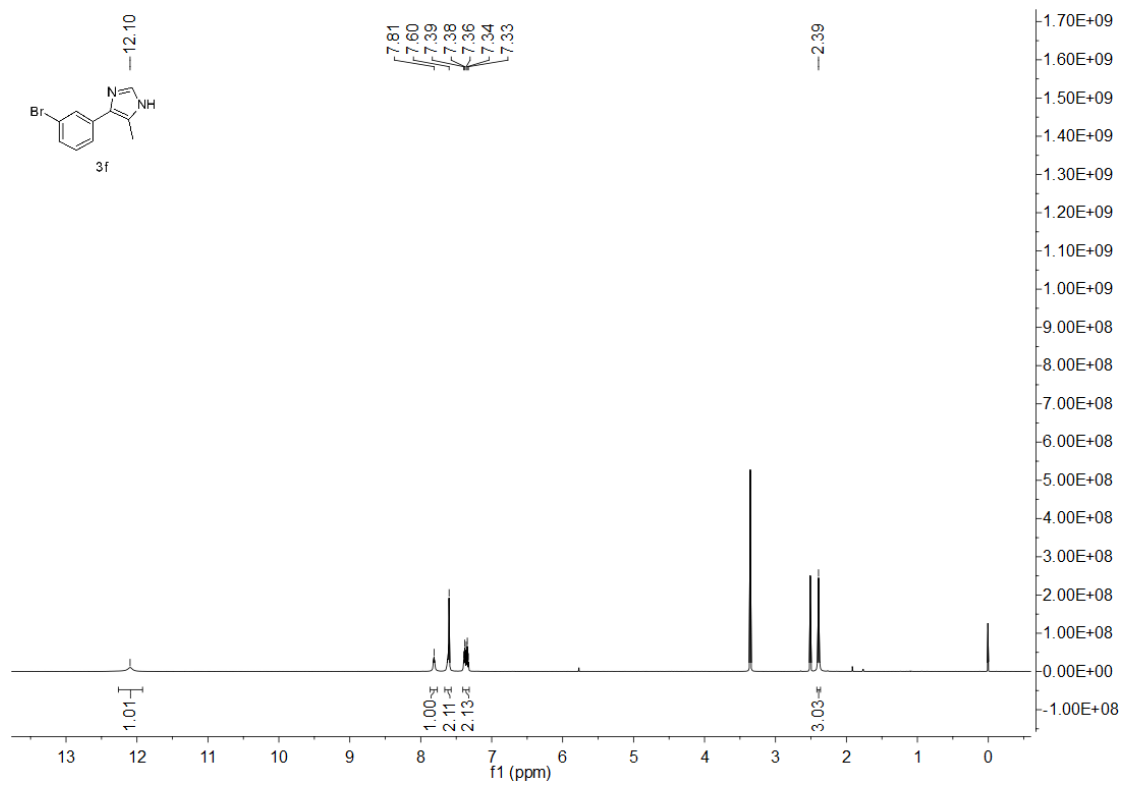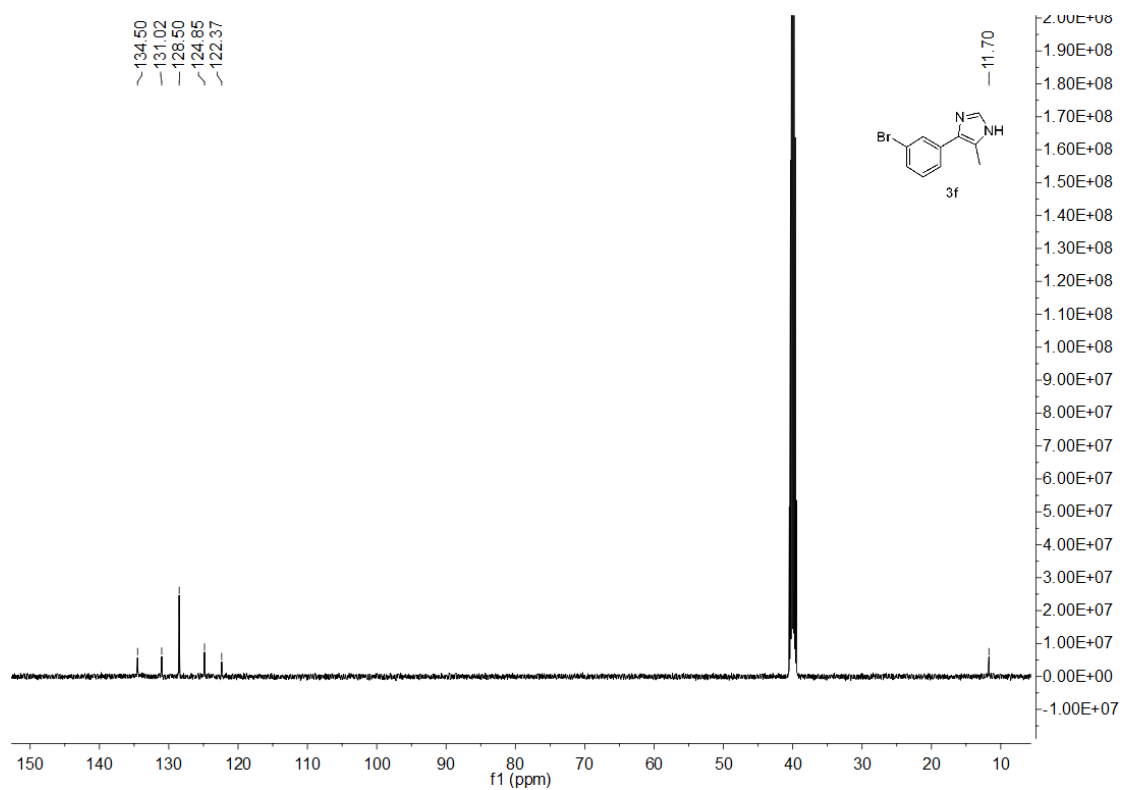

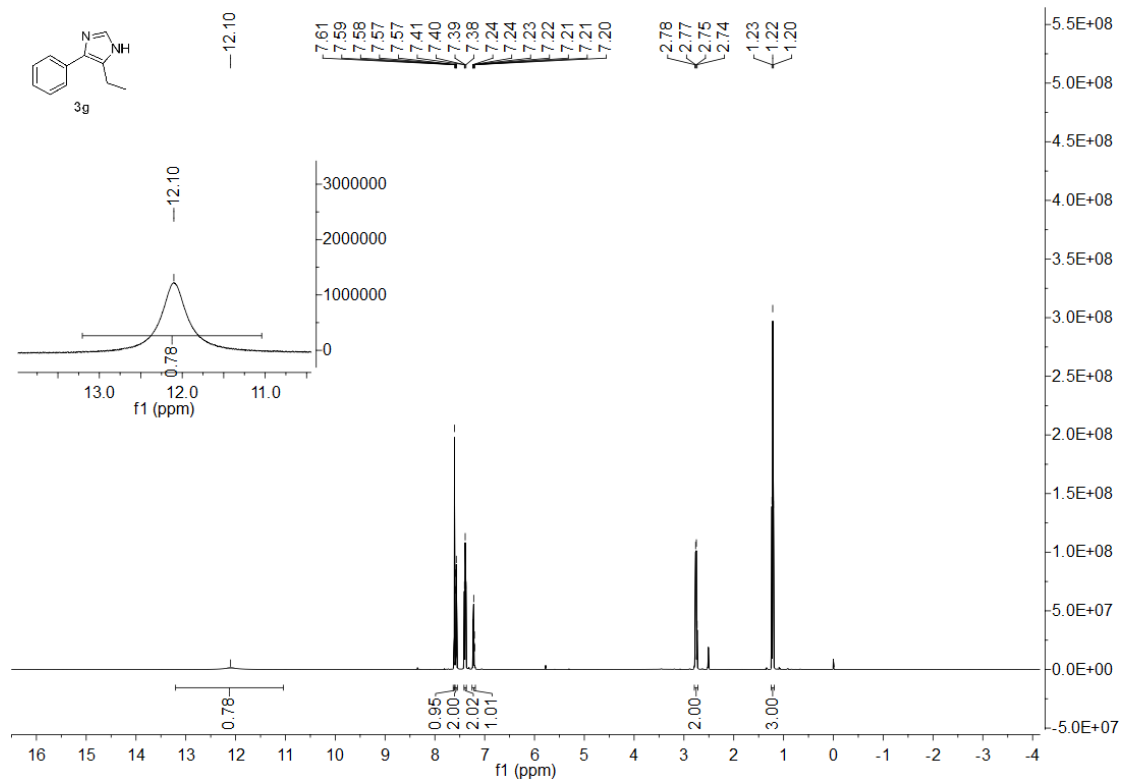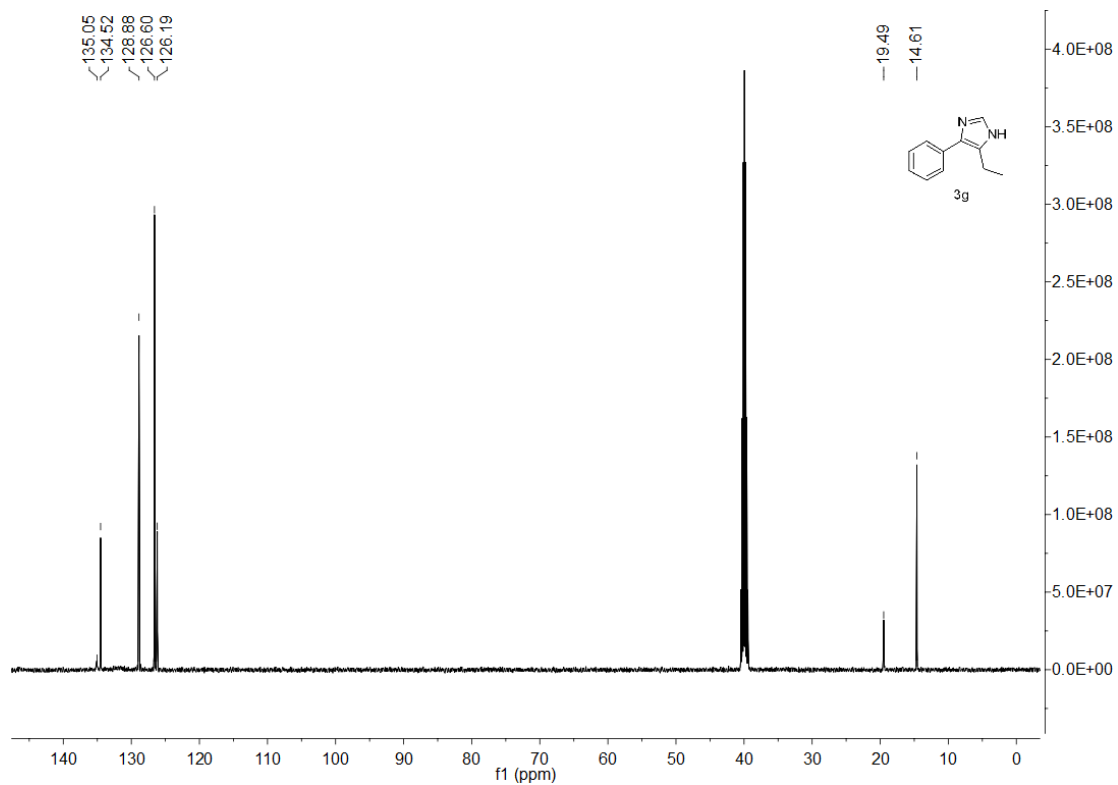



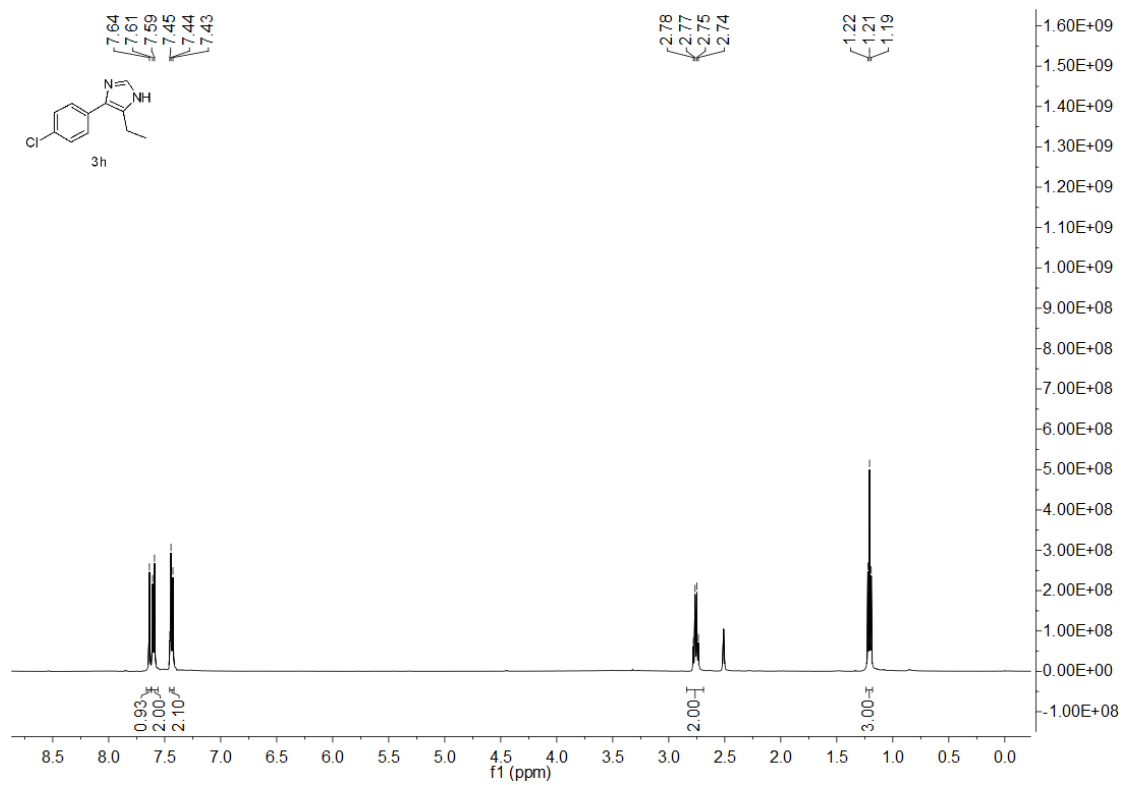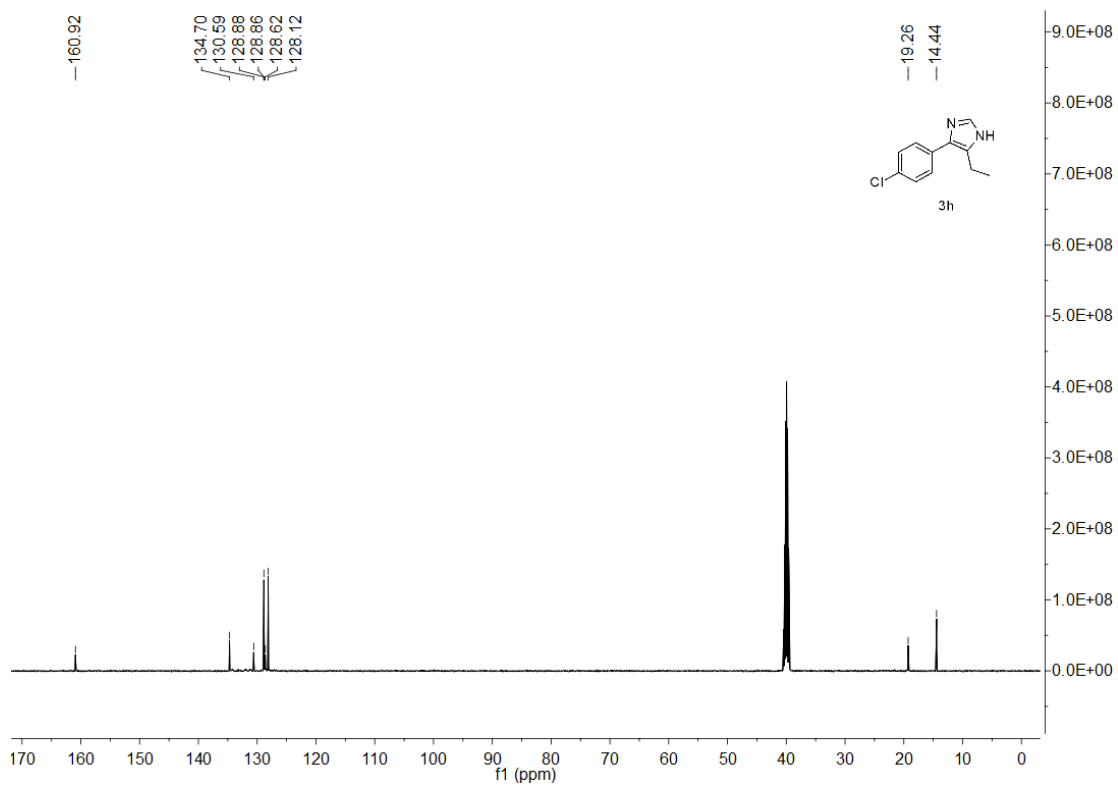

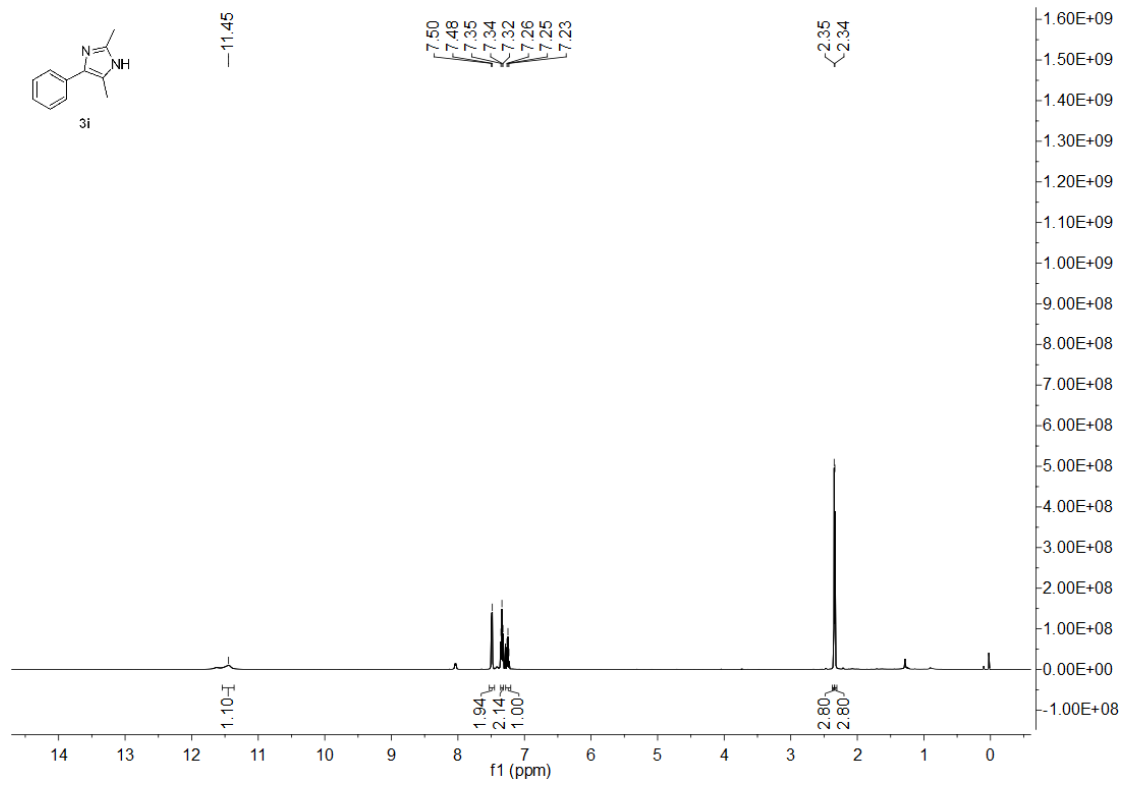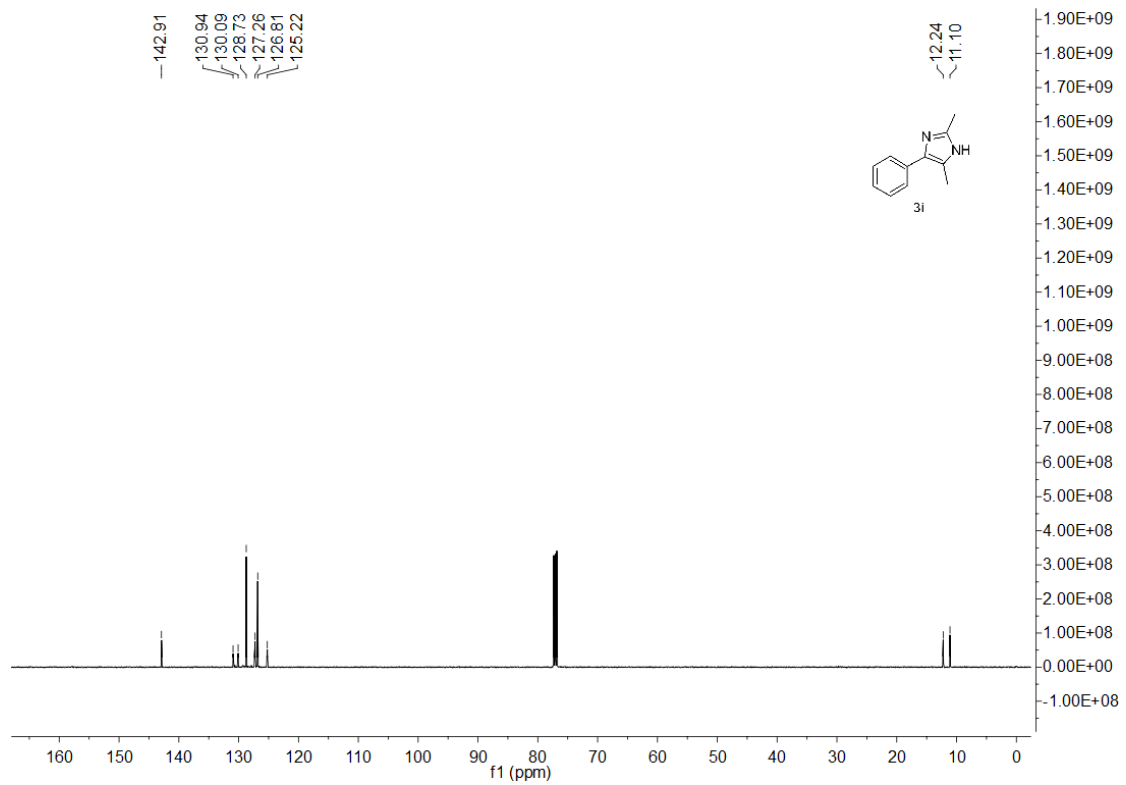

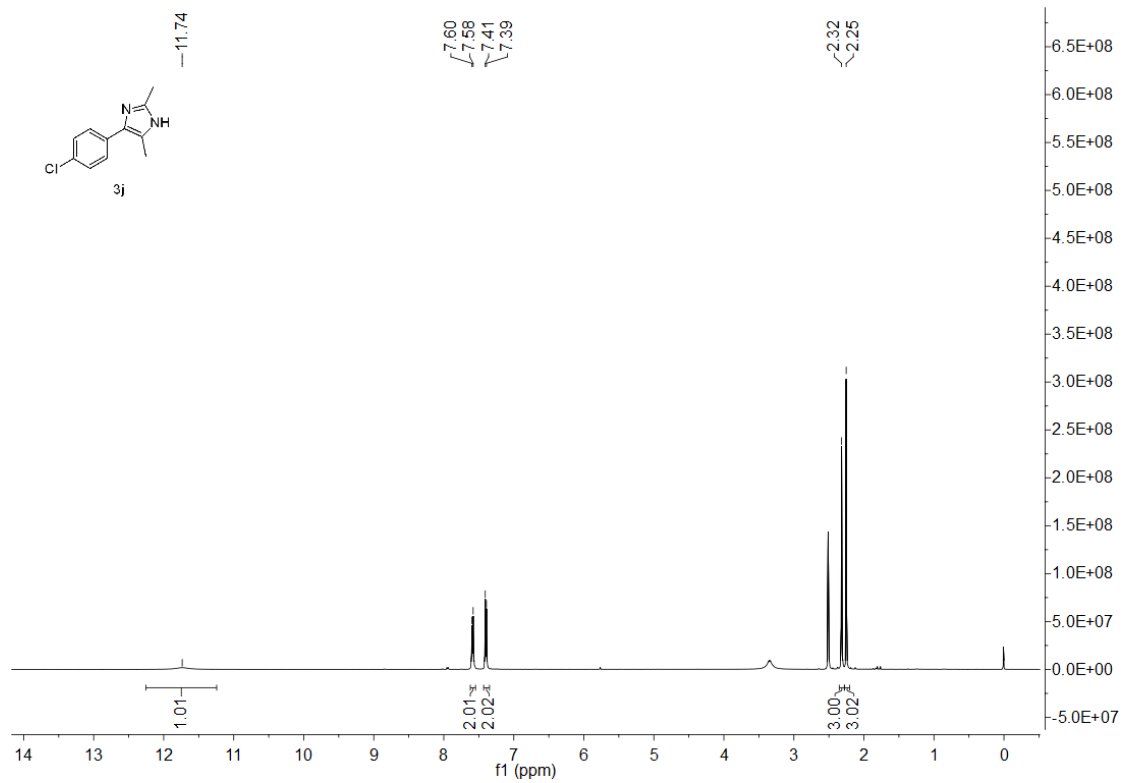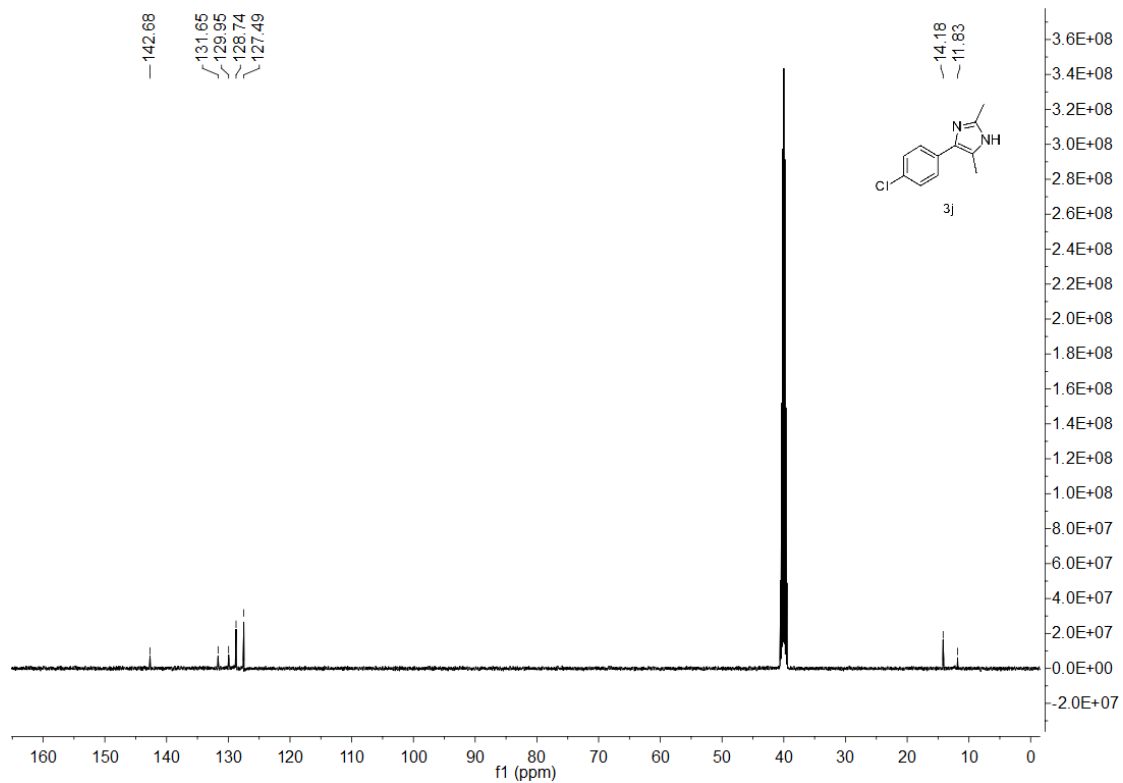

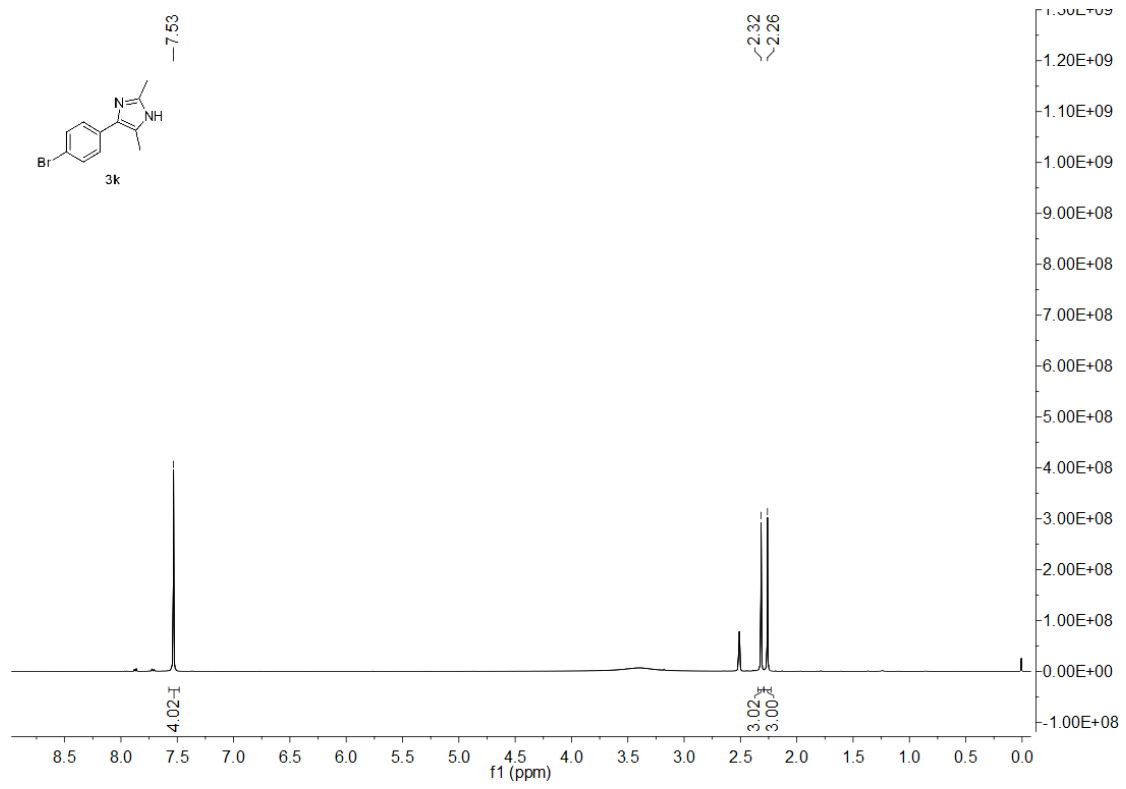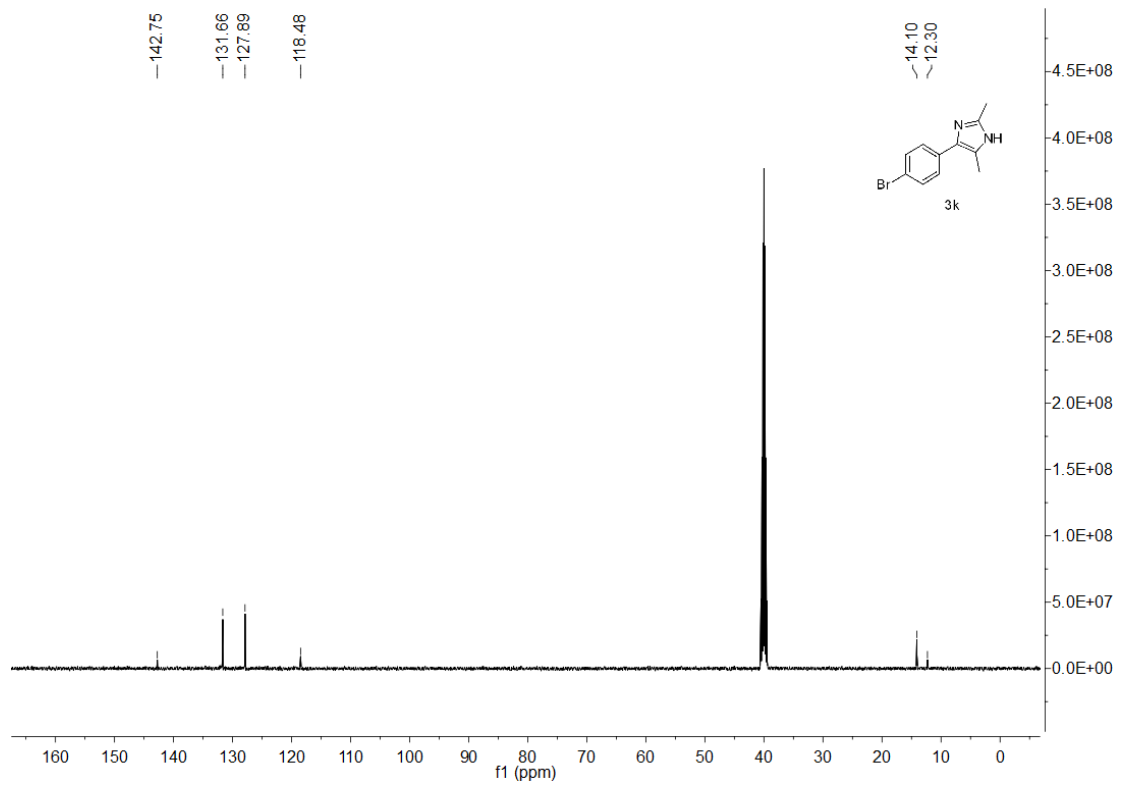

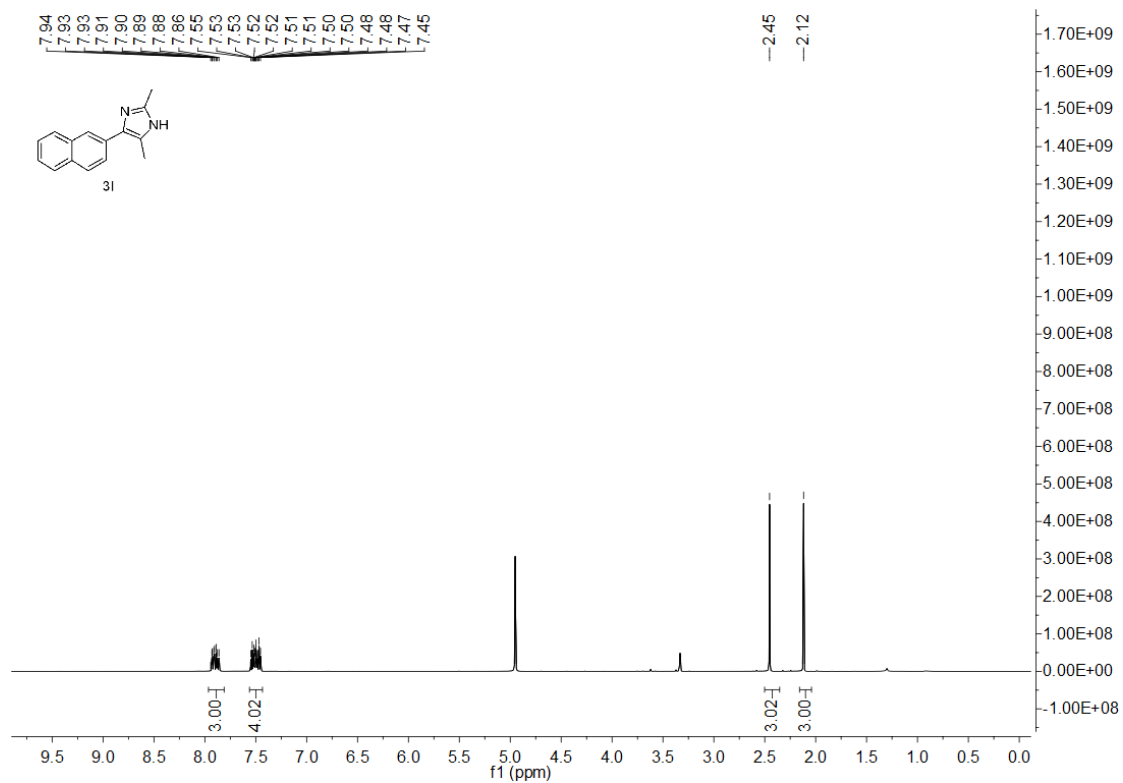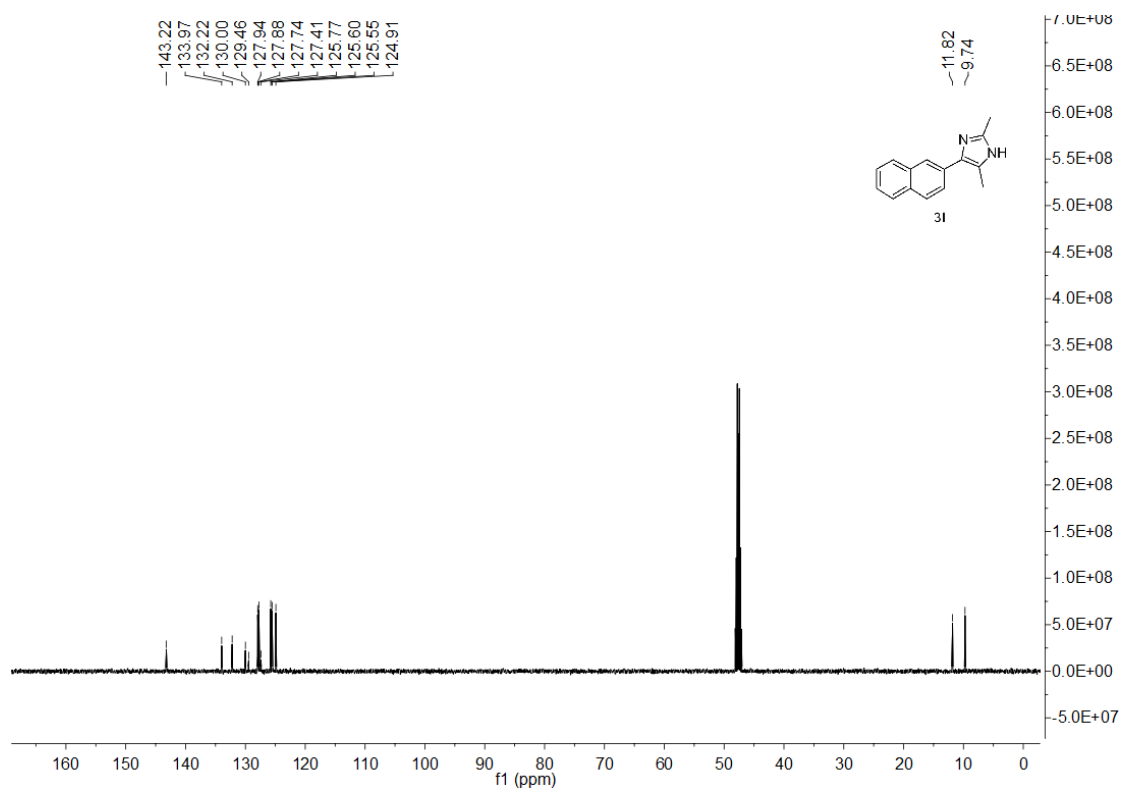

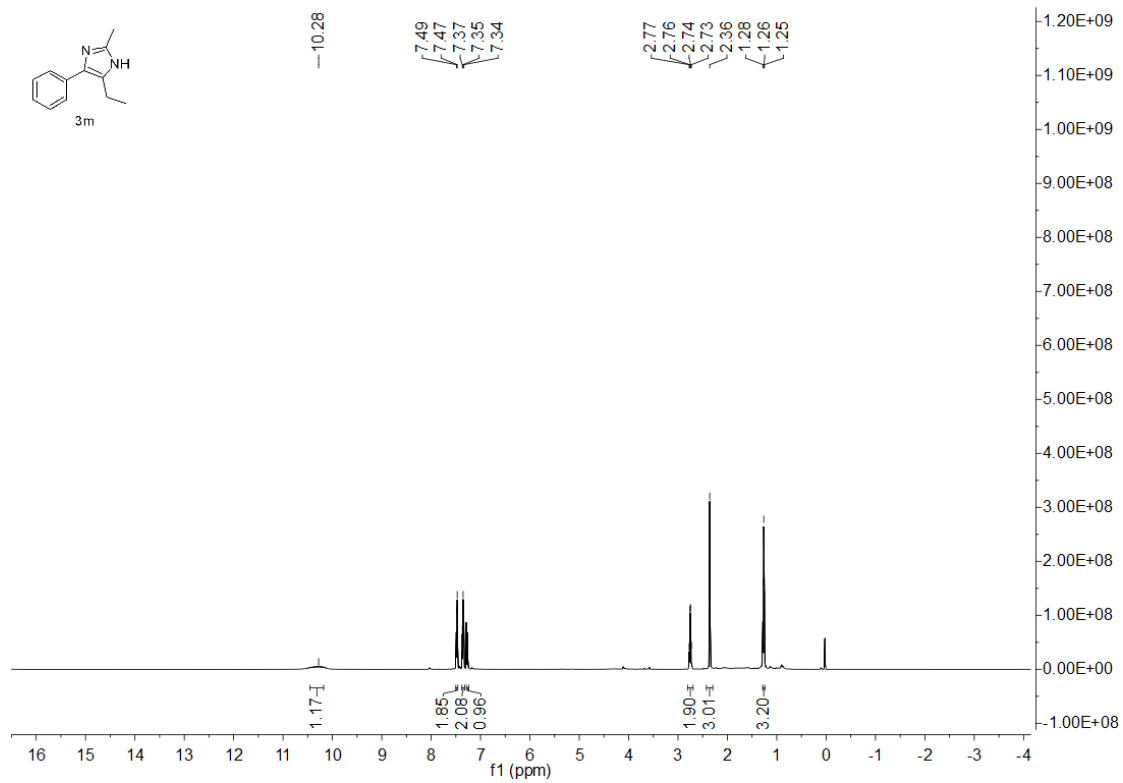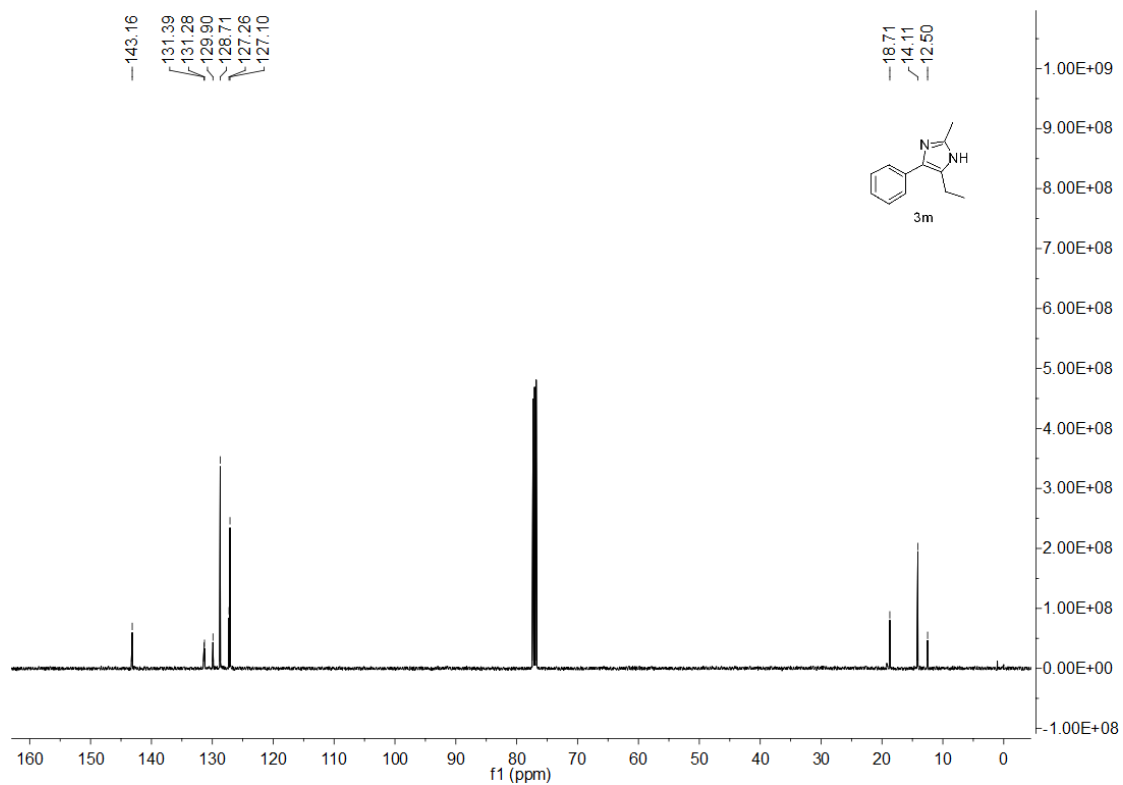

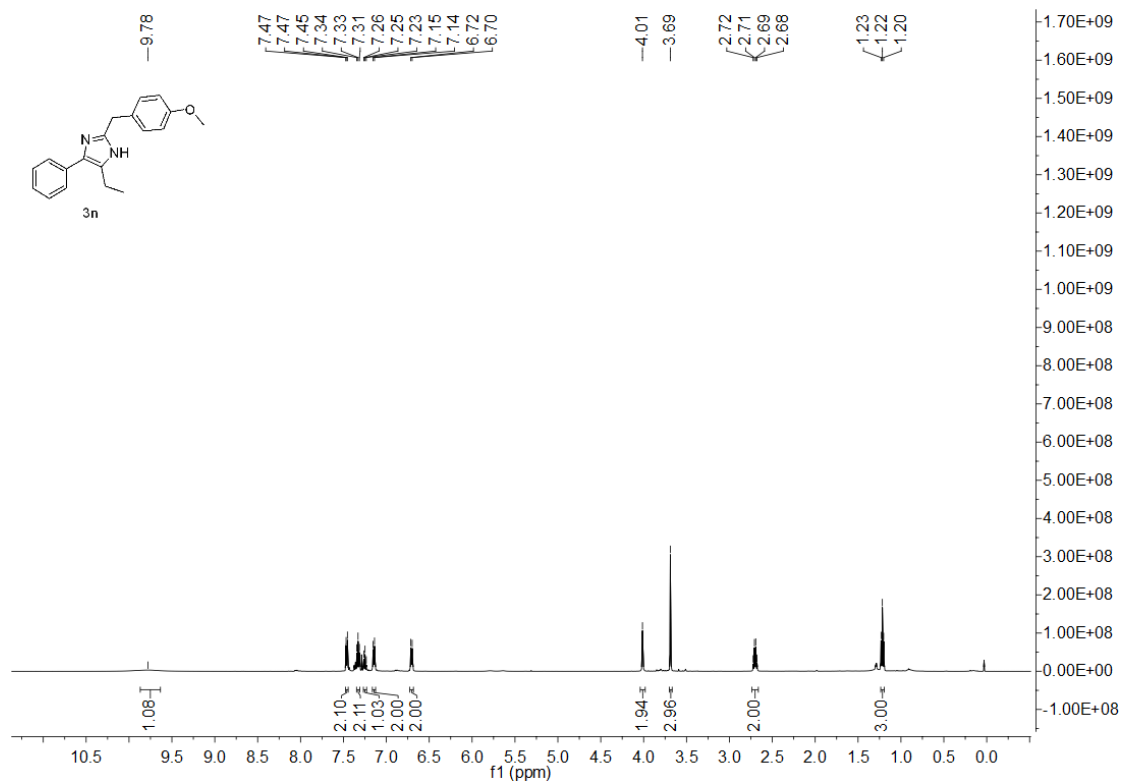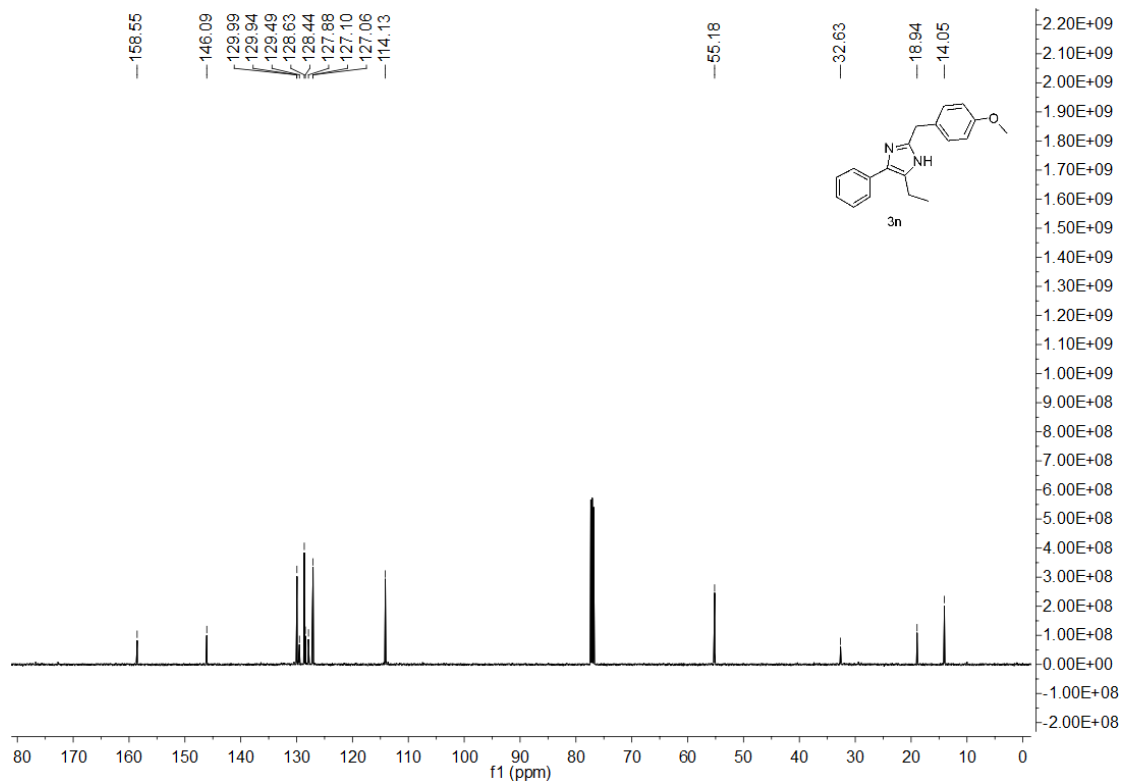

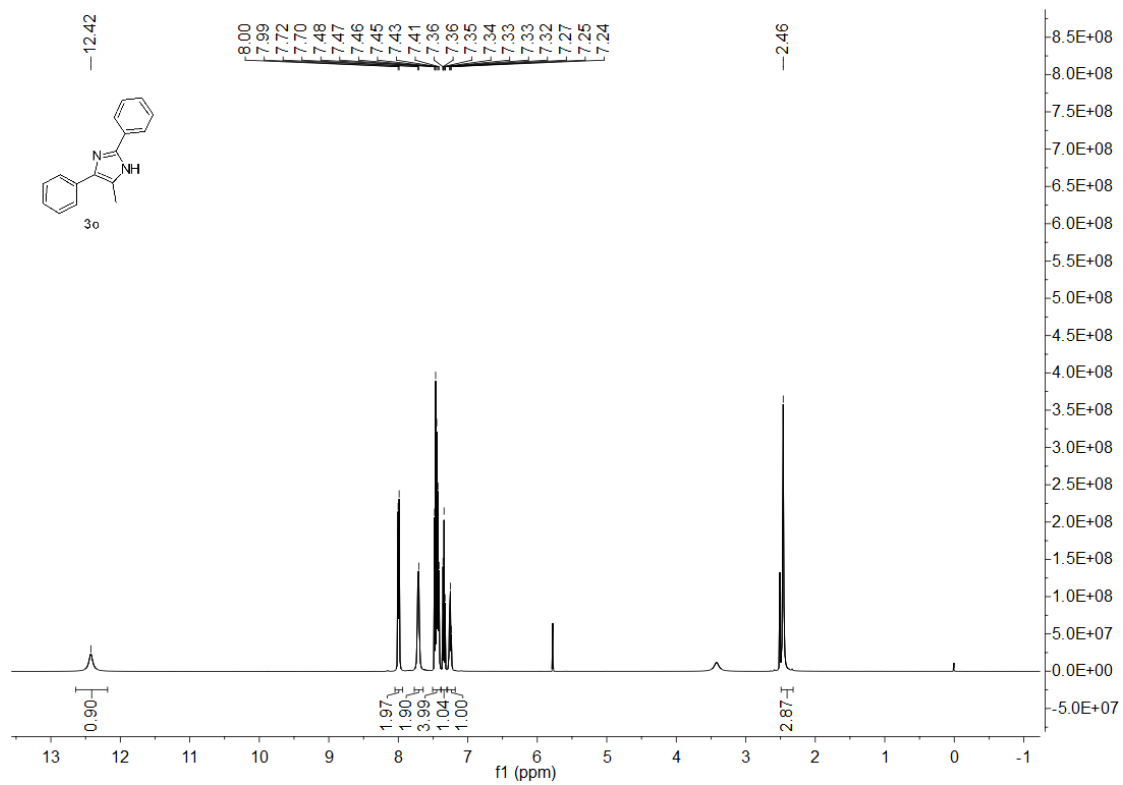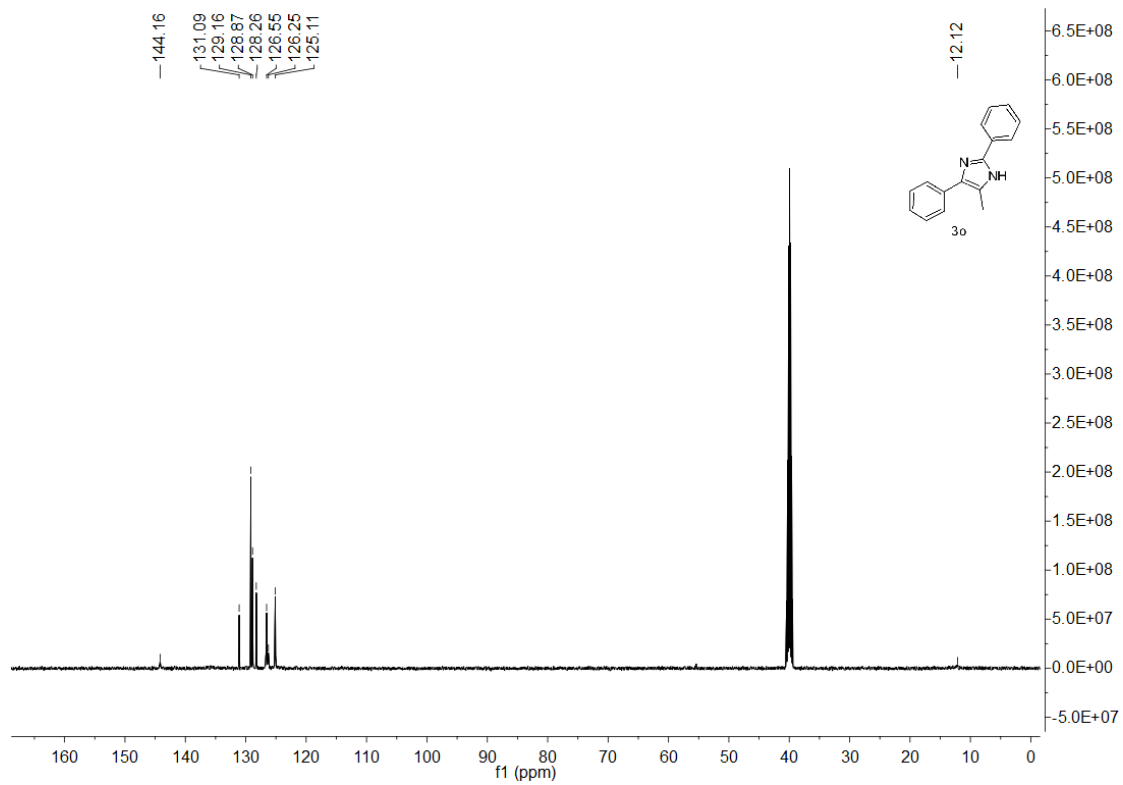



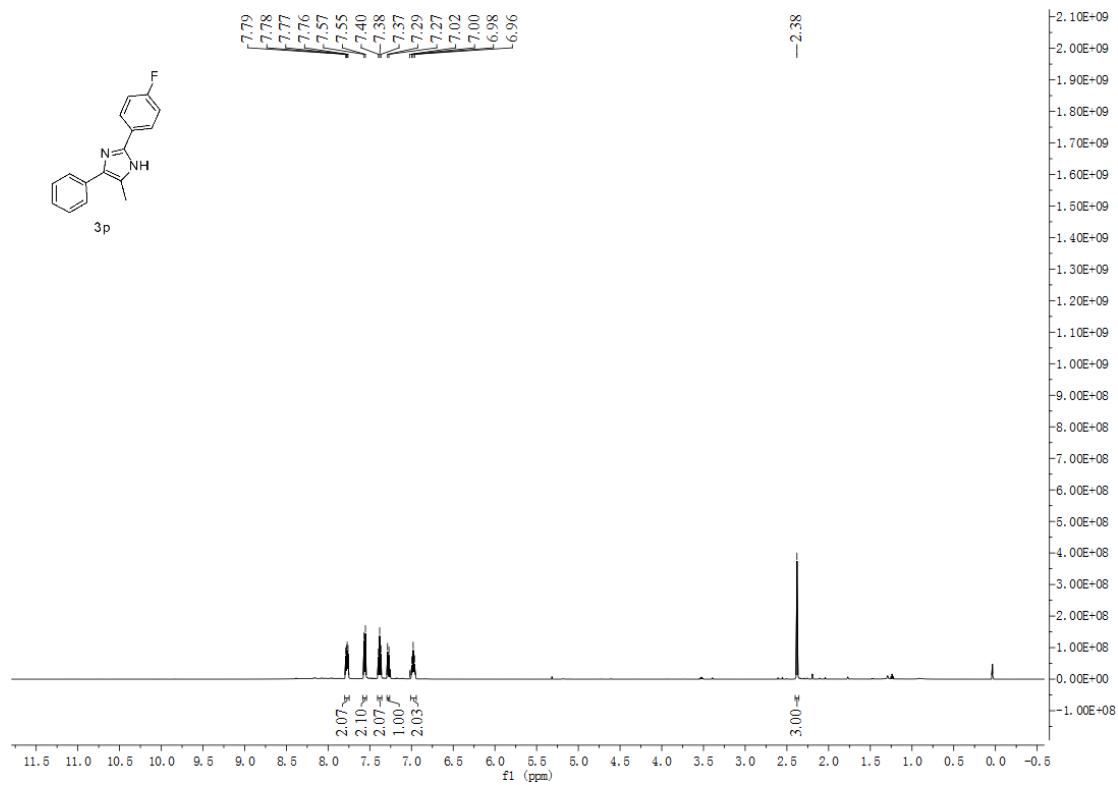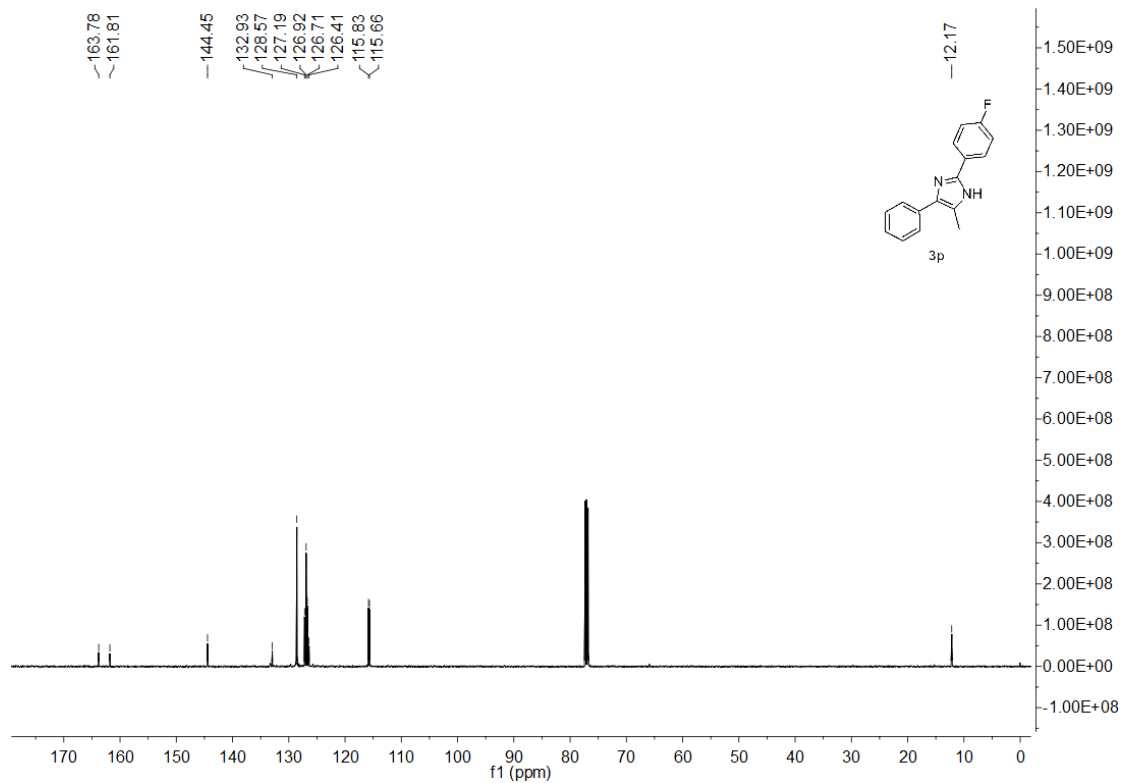

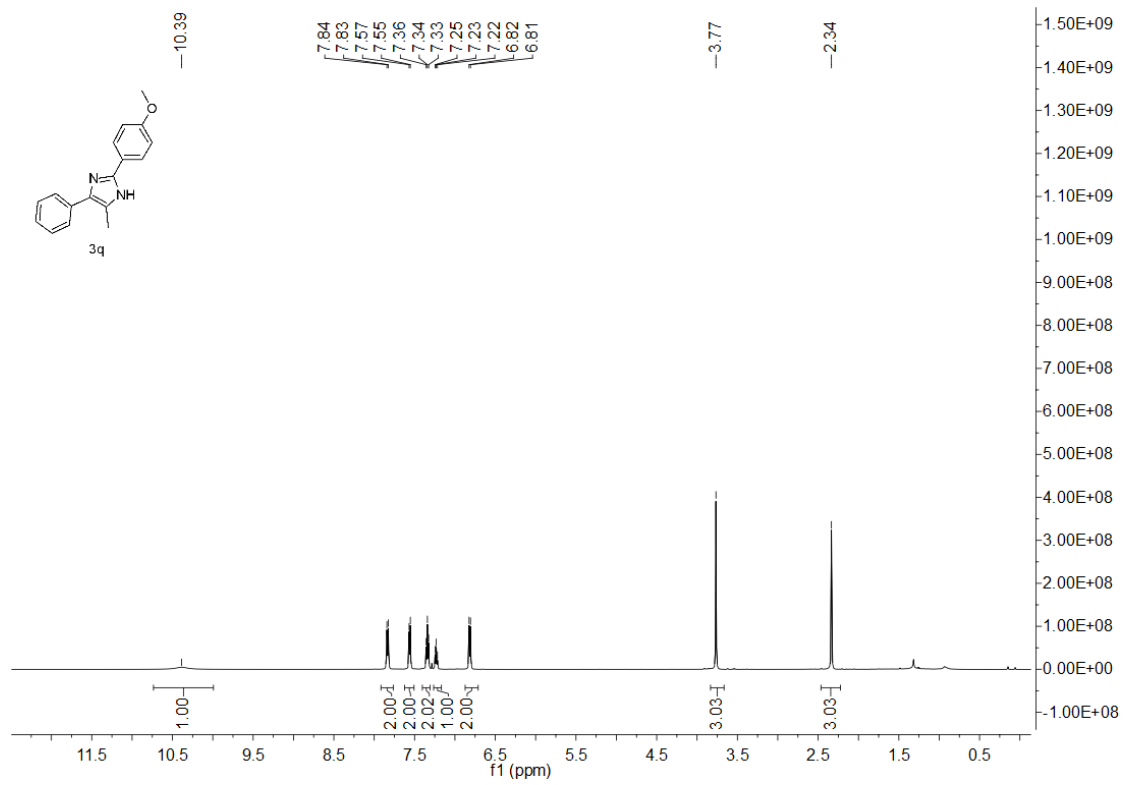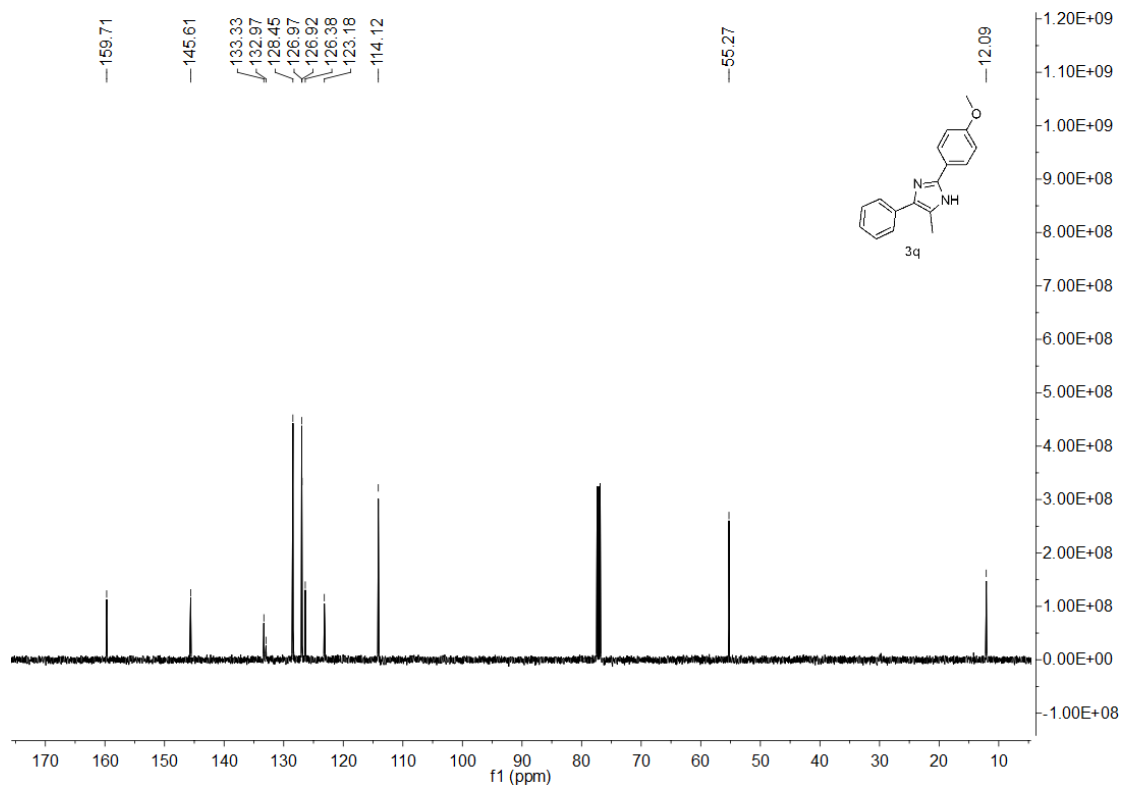

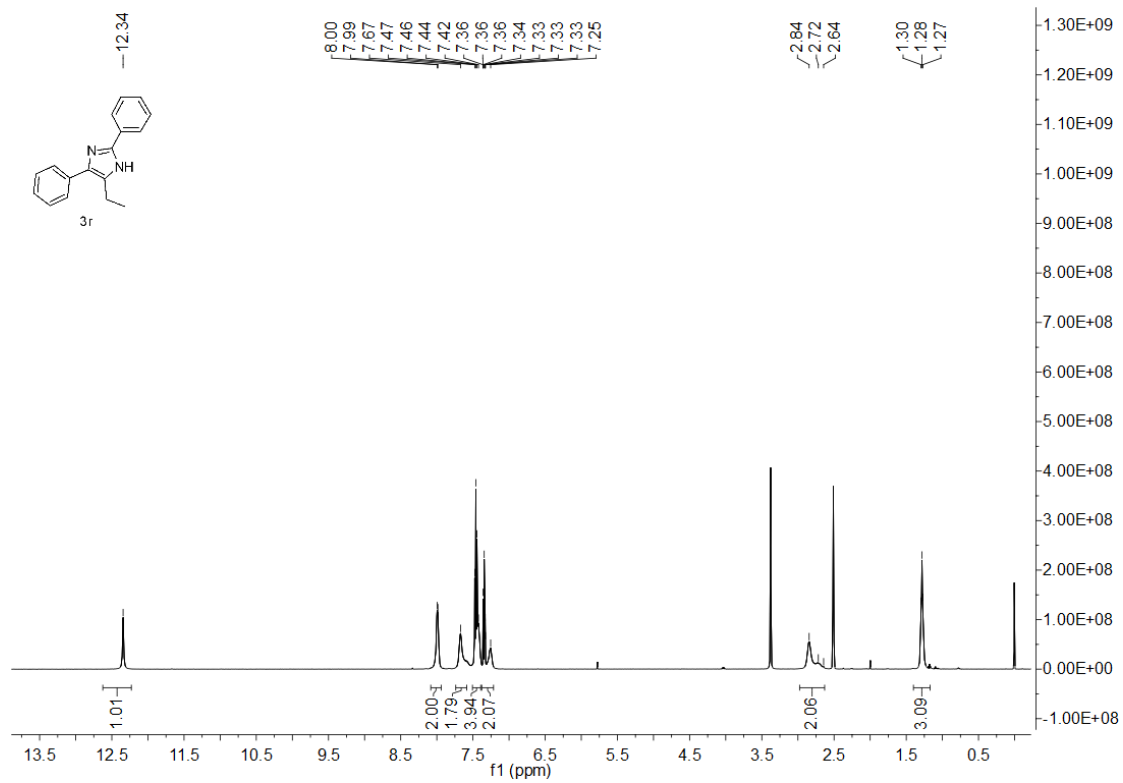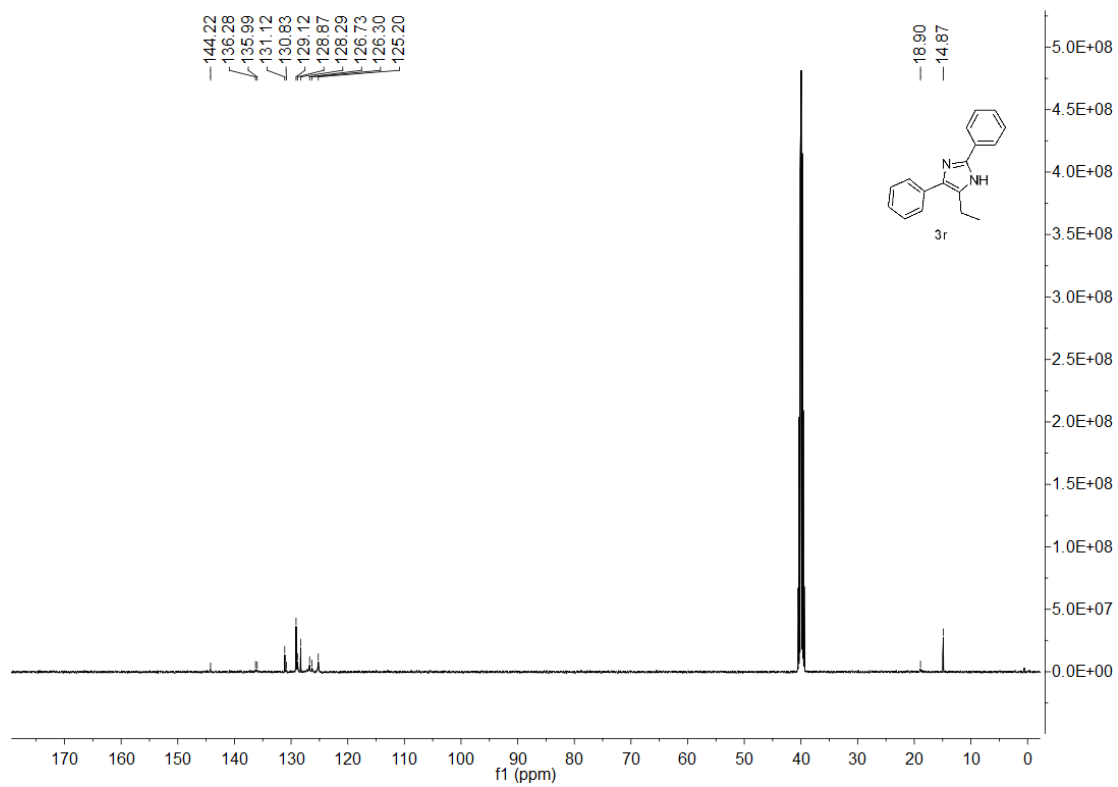

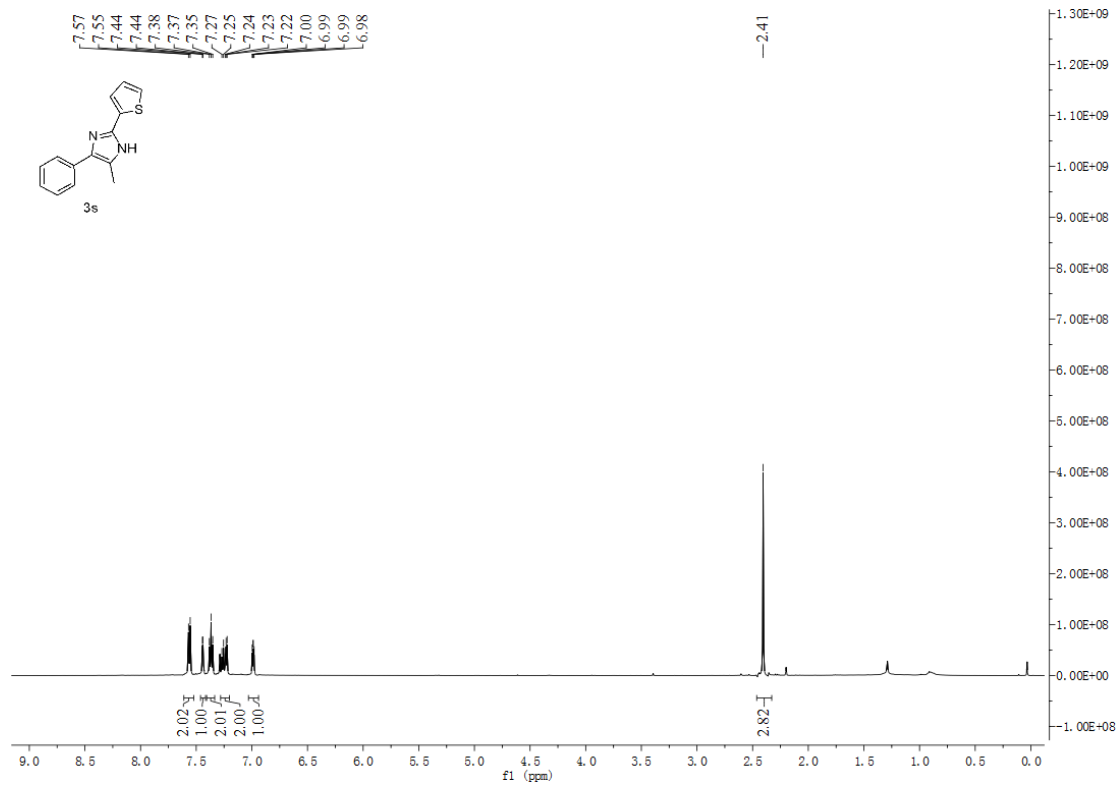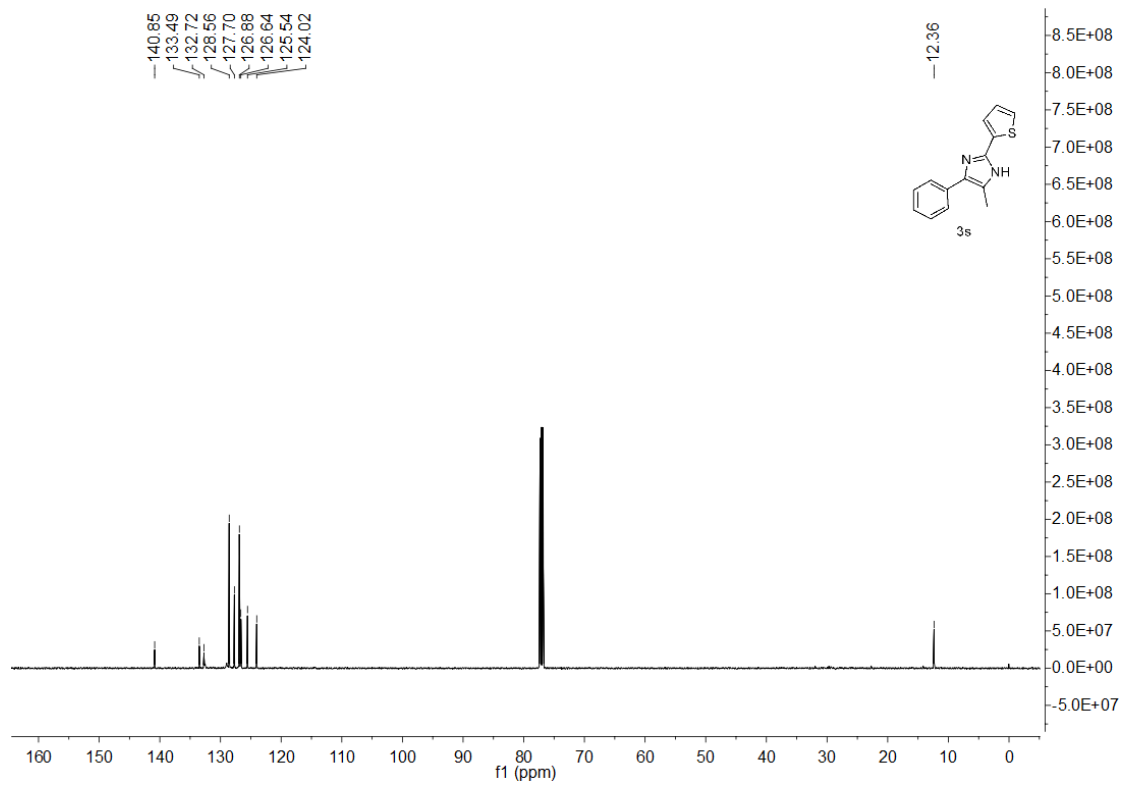

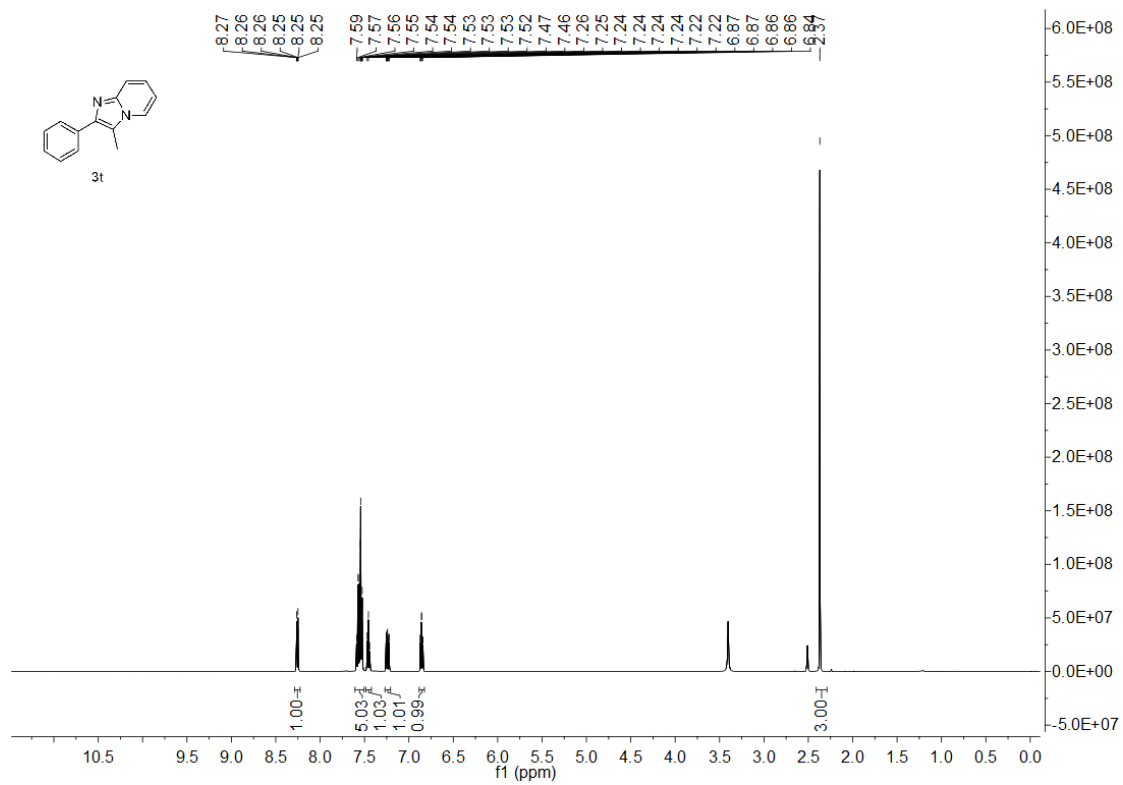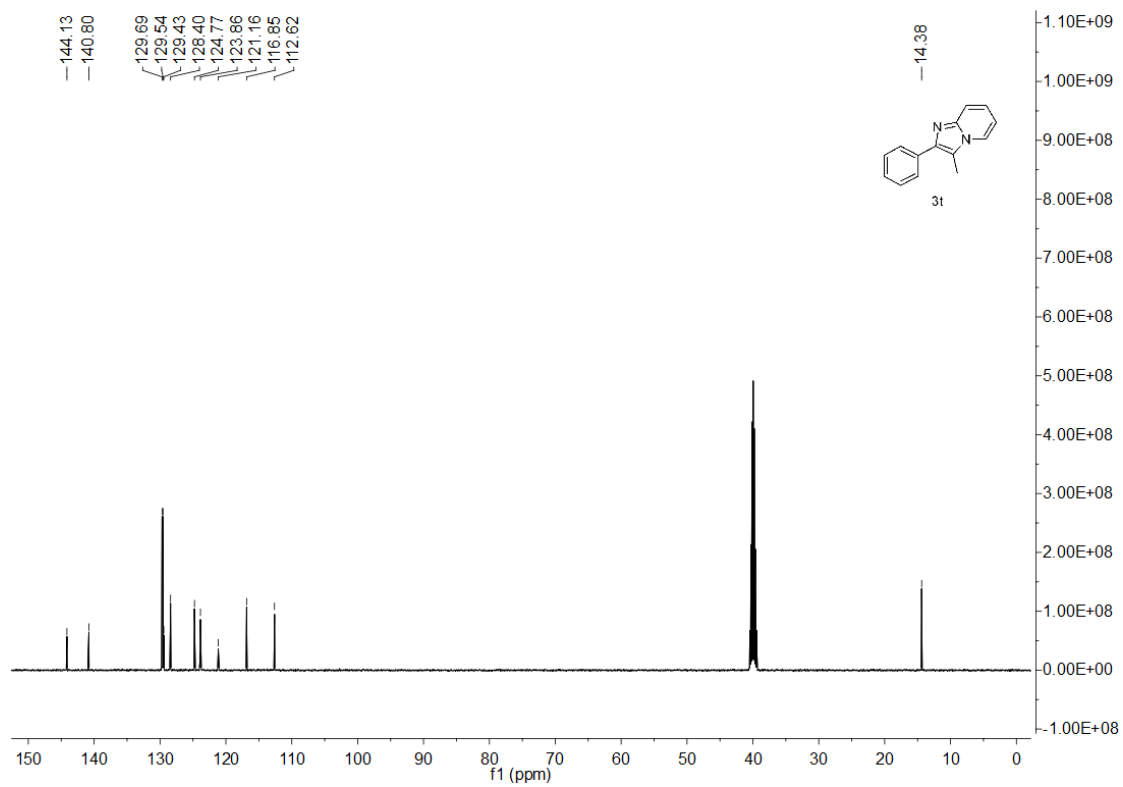

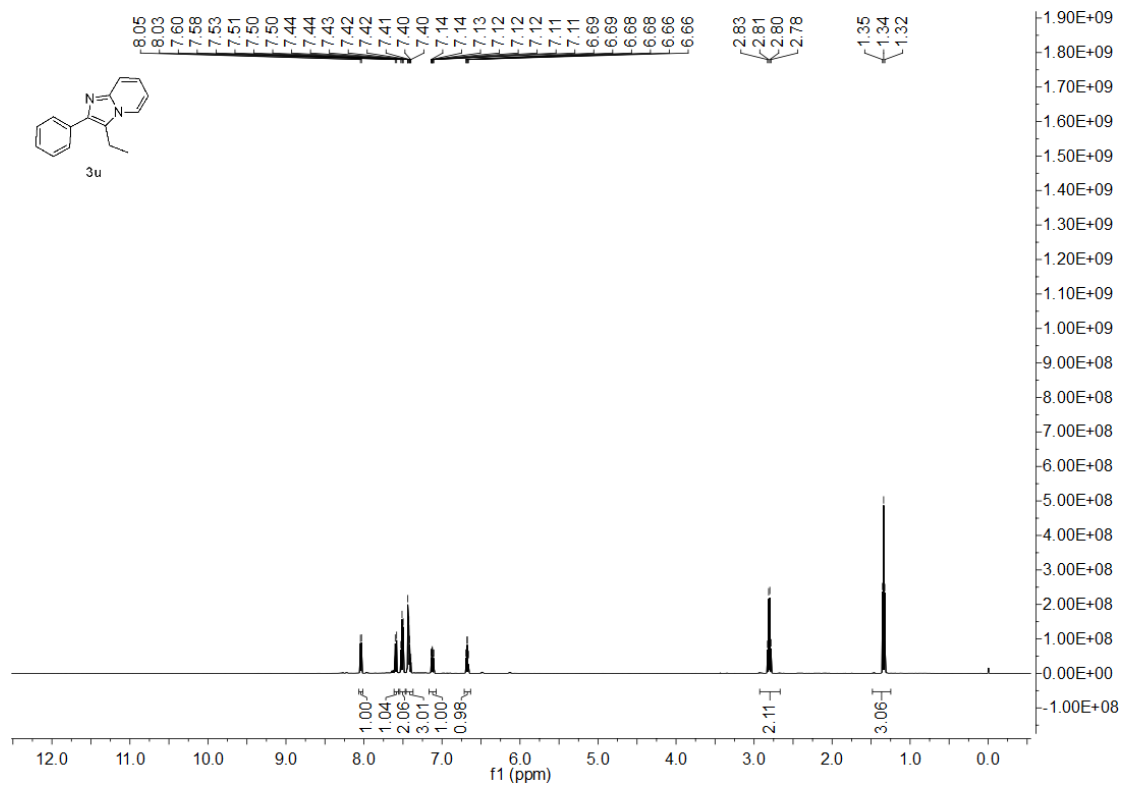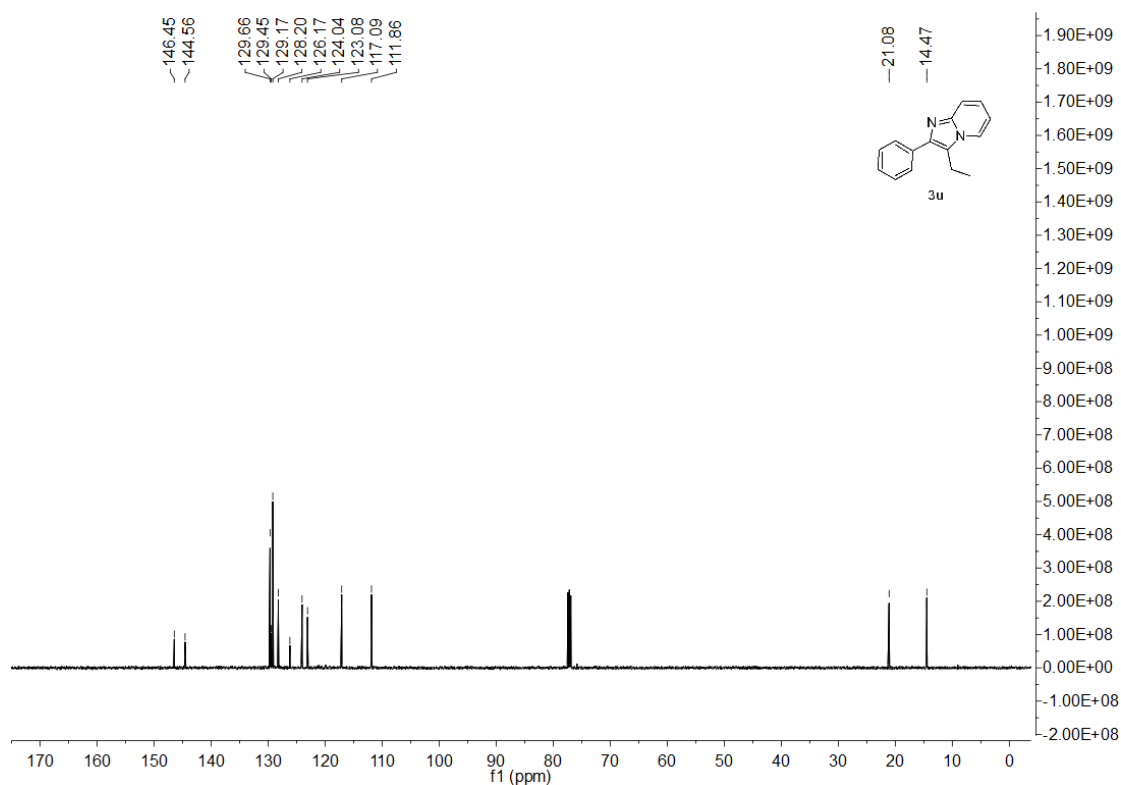

Ref:

1. Y. D. Vankar, K. Shah, A. Bawa, S.P. Singh, *Tetrahedron* 1991,**47**, 8883.
2. A. Vidal-Albalat, S. Rodríguez and F. V. González, *Org Lett.*, 2014, **16**, 1752.
3. S. Mitra, A. K. Bagdi, A. Majee and A. Hajra, *Tetrahedron Lett.*, 2013, **54**, 4982.
